# Supplementary material for: Assembly of a basket-like {Sr ⊂ P6Mo18O73} cage from 0D dimmer to 2D network and its photo-/electro-catalytic properties
Source: Royal Society of Chemistry journal article supplement (doi:10.1039/c5dt01480h), 2015-01-01
Supplement: c5dt01480h1.pdf [file c5dt01480h1.pdf]

## Support Information

### Extension of Basket-Liked $\{\text{Sr}\text{P}_6\text{Mo}_{18}\text{O}_{73}\}$ Cage from 0D Dimmer to 2D Network and Photo-/Electro-catalytic properties

He Zhang<sup>a,b</sup>, Jing-hua Lv<sup>a</sup>, Kai Yu<sup>a,b\*</sup>, Chun-mei Wang<sup>a,b</sup>, Chun-xiao Wang<sup>a,b</sup>, Sun Di<sup>c</sup>, Bai-Bin Zhou<sup>a,b\*</sup>

#### 1. Structural figures

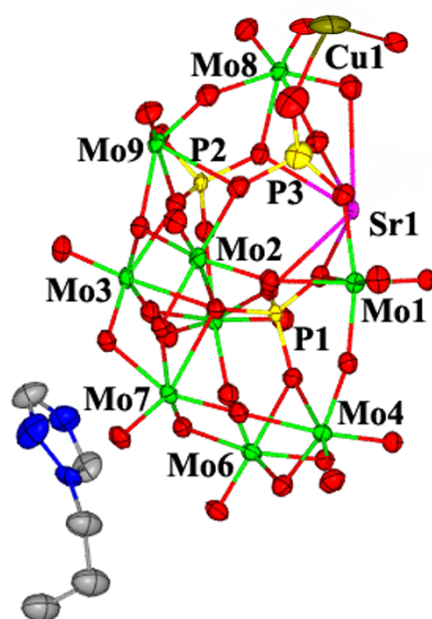

Figure S1 ORTEP view of the basic units in compound 1 with 50% thermal ellipsoid.

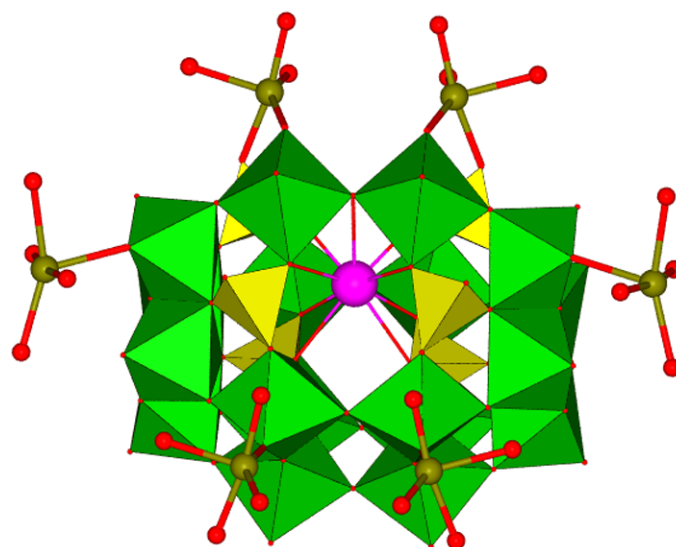

Figure S2 The coordination pattern of  $\{\text{P}_6\text{Mo}_{18}\text{O}_{73}\}$  cluster of compound 1

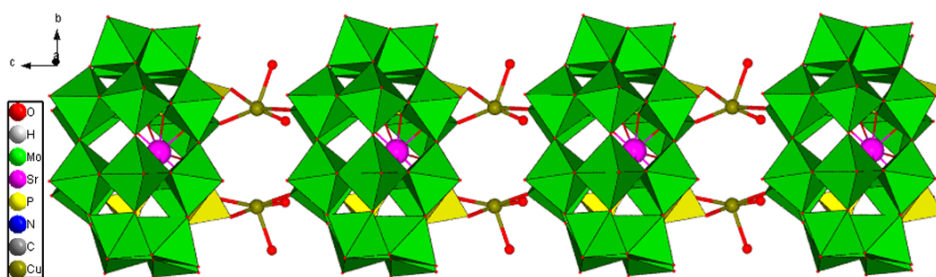

**Figure S3** The 1-D chain on the bc plane of compound 1.

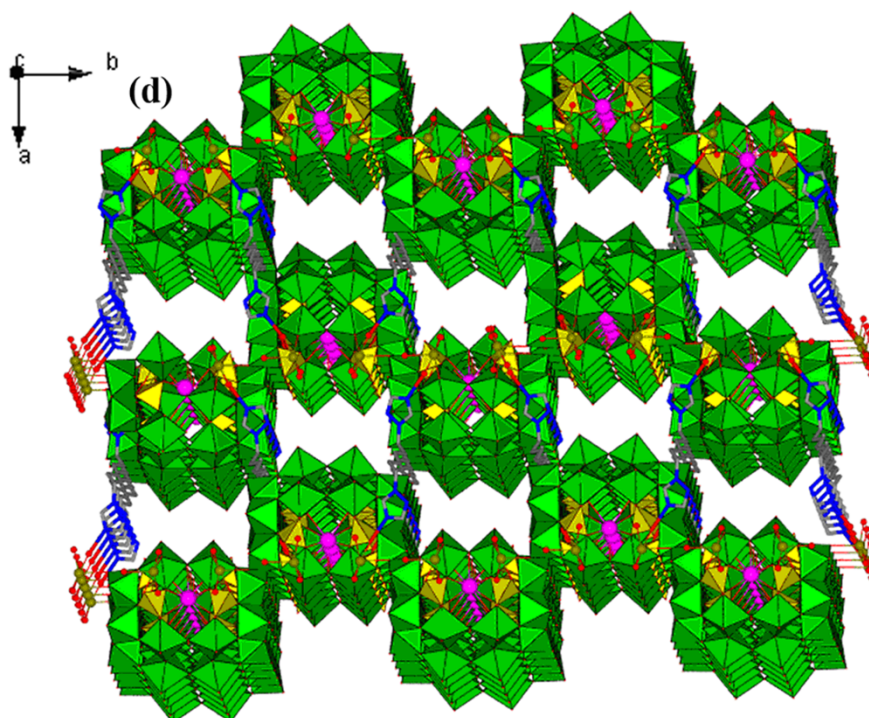

**Figure S4** The 3-D supramolecular network on the ab plane of compound 1.

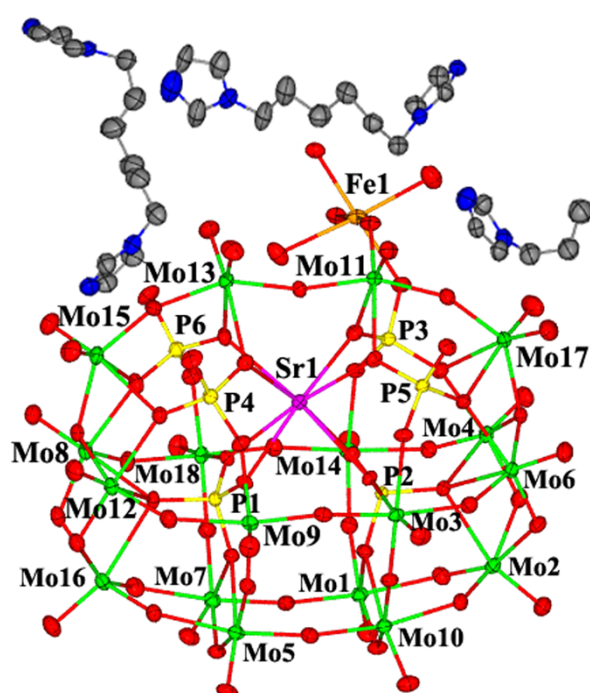

**Figure S5** ORTEP view of the basic units in compound 2 with 50% thermal ellipsoid.

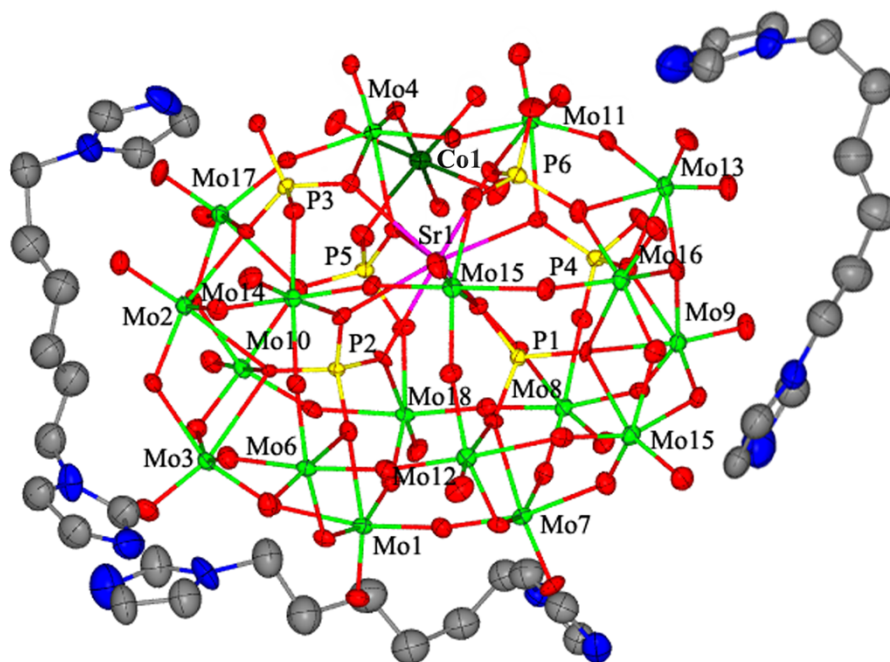

**Figure S6** ORTEP view of the basic units in compound **3** with 50% thermal ellipsoid.

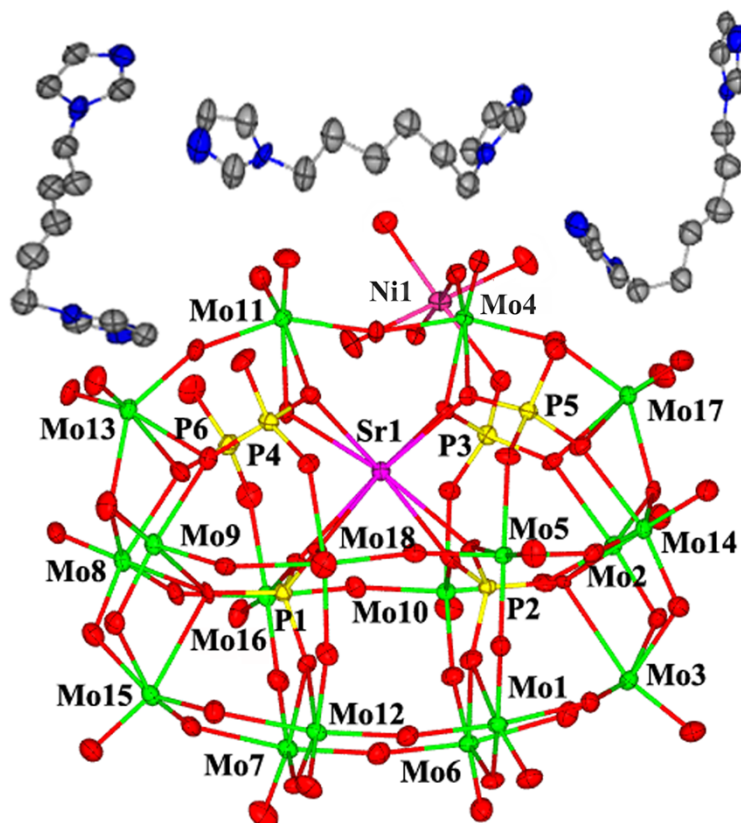

**Figure S7** ORTEP view of the basic units in compound **4** with 50% thermal ellipsoid.

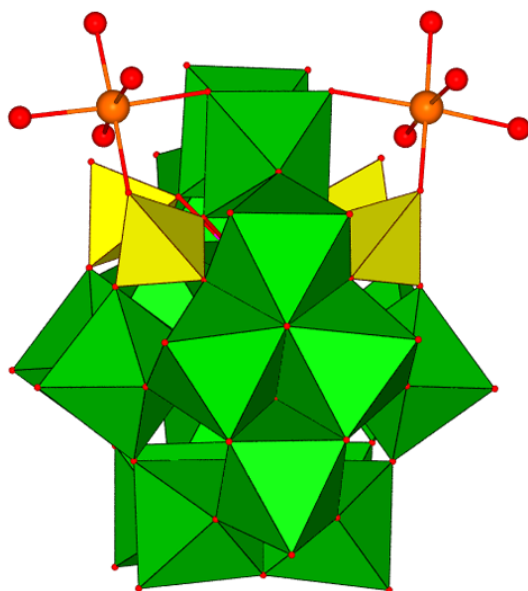

**Figure S8** The coordination pattern of {P<sub>6</sub>Mo<sub>18</sub>O<sub>73</sub>} cluster of compound **2**

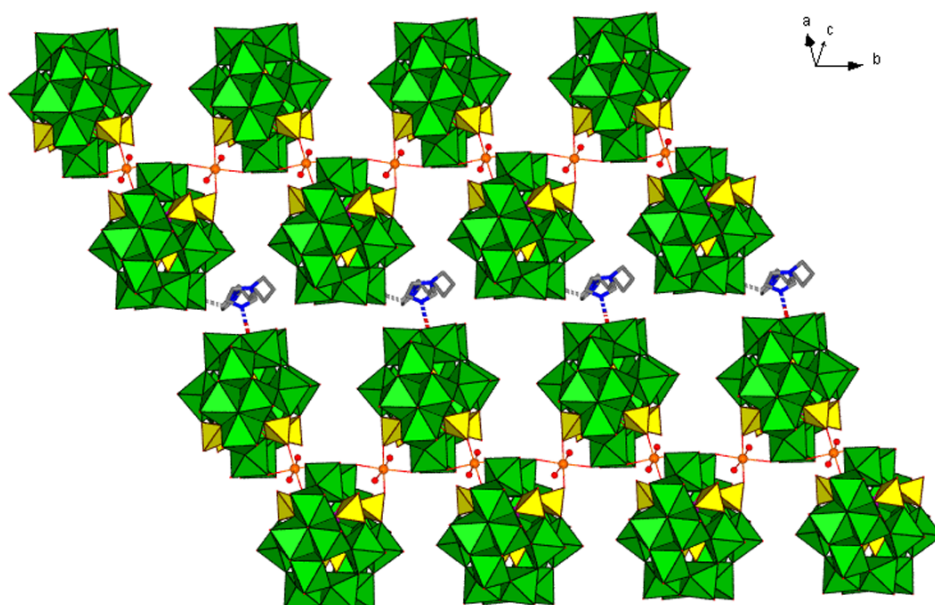

**Figure S9** The 2-D supramolecular layer of compound **2** connected by bih ligand

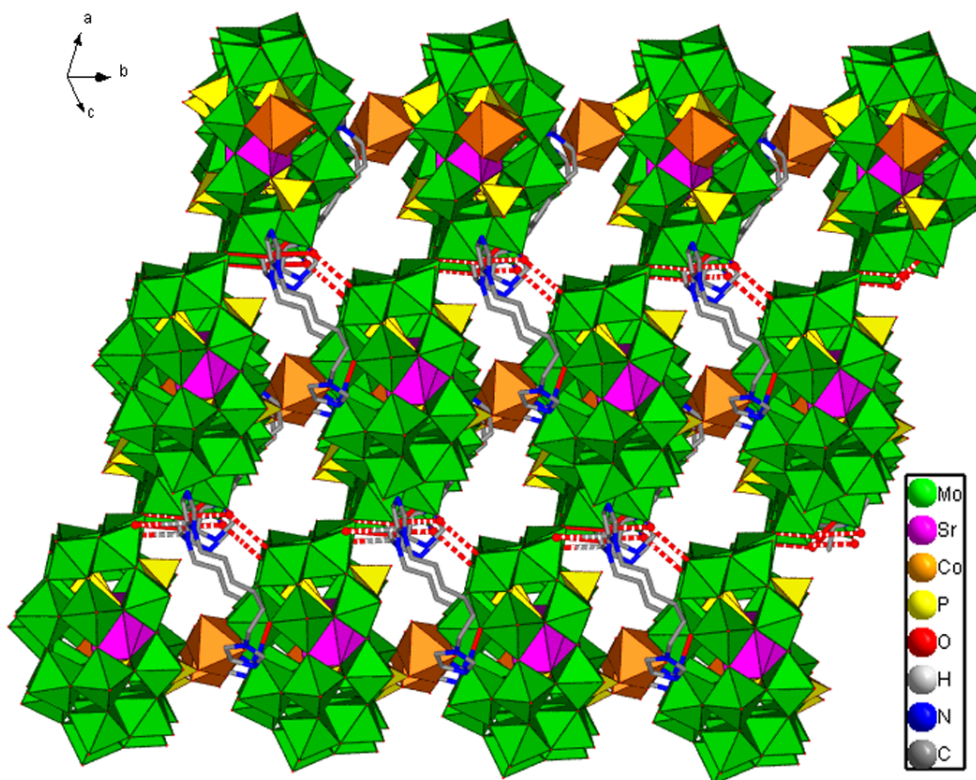

**Figure S10** The 3-D supramolecular network of compound **2** linked by water molecular.

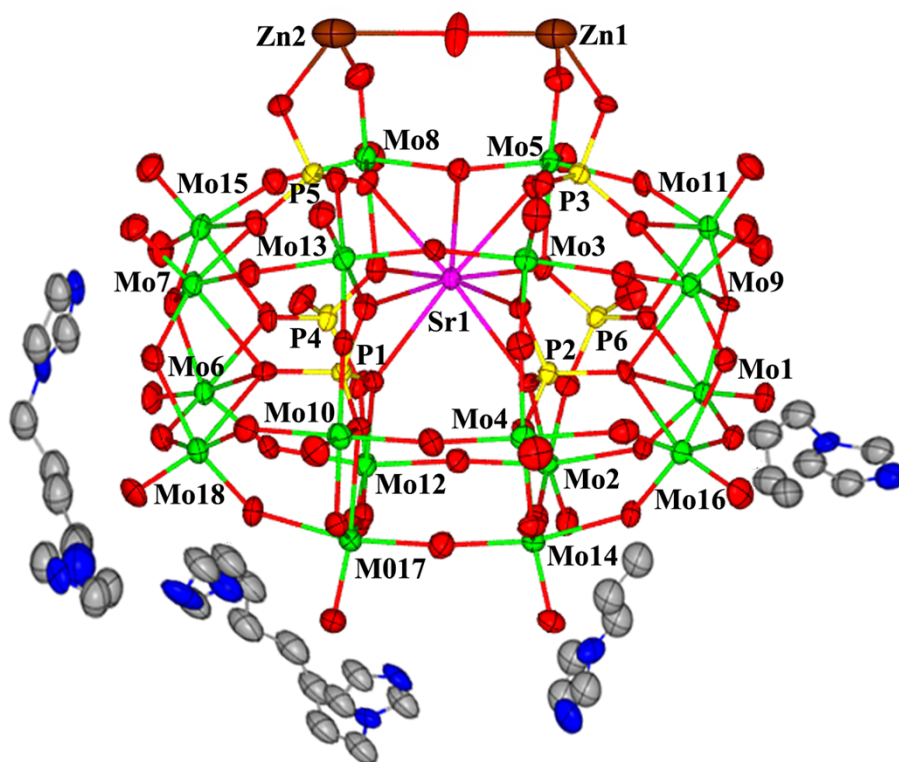

**Figure S11** ORTEP view of the basic units in compound **5** with 50% thermal ellipsoid.

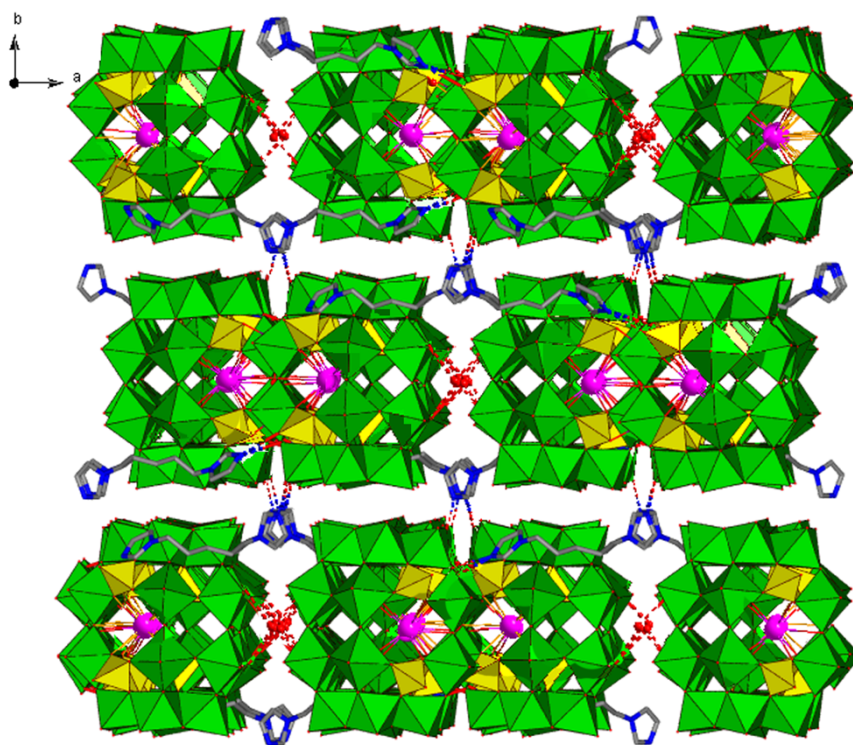

**Figure S12** The 3-D supramolecular layer in compound **5**

## 2. Structural data

**Table S1** Selected bond lengths (Å) and bond angles (°) of compound **1**

|                   |           |                   |           |                   |           |
|-------------------|-----------|-------------------|-----------|-------------------|-----------|
| Mo(1)-O(36)       | 1.684(19) | Mo(1)-O(2)        | 1.872(3)  | Mo(1)-O(15)       | 2.057(18) |
| Mo(1)-O(16)       | 1.871(19) | Mo(1)-O(27)       | 2.046(18) | Mo(1)-O(6)        | 2.234(18) |
| Mo(2)-O(37)       | 1.673(19) | Mo(2)-O(9)        | 1.805(18) | Mo(2)-O(32)       | 2.162(18) |
| Mo(2)-O(27)       | 1.776(18) | Mo(2)-O(7)        | 2.073(19) | Mo(2)-O(19)       | 2.358(18) |
| Mo(3)-O(30)       | 1.694(18) | Mo(3)-O(13)       | 1.807(18) | Mo(3)-O(21)       | 2.149(19) |
| Mo(3)-O(31)       | 1.774(18) | Mo(3)-O(7)        | 2.044(19) | Mo(3)-O(19)       | 2.462(18) |
| Mo(4)-O(40)       | 1.677(18) | Mo(4)-O(16)       | 1.892(19) | Mo(4)-O(22)       | 2.069(18) |
| Mo(4)-O(14)       | 1.880(3)  | Mo(4)-O(10)       | 1.990(19) | Mo(4)-O(11)       | 2.295(18) |
| Mo(5)-O(34)       | 1.665(18) | Mo(5)-O(5)        | 1.880(18) | Mo(5)-O(28)       | 2.048(19) |
| Mo(5)-O(3)        | 1.866(3)  | Mo(5)-O(31)       | 2.044(18) | Mo(5)-O(4)        | 2.234(18) |
| Mo(6)-O(35)       | 1.69(2)   | Mo(6)-O(5)        | 1.882(18) | Mo(6)-O(17)       | 2.086(18) |
| Mo(6)-O(8)        | 1.882(3)  | Mo(6)-O(10)       | 1.989(19) | Mo(6)-O(11)       | 2.281(18) |
| Mo(7)-O(29)       | 1.696(18) | Mo(7)-O(22)       | 1.806(18) | Mo(7)-O(13)       | 2.084(18) |
| Mo(7)-O(17)       | 1.797(18) | Mo(7)-O(9)        | 2.063(18) | Mo(7)-O(19)       | 2.405(18) |
| Mo(8)-O(38)       | 1.69(2)   | Mo(8)-O(1)        | 1.895(5)  | Mo(8)-O(18)       | 2.236(18) |
| Mo(8)-O(33)       | 1.70(2)   | Mo(8)-O(23)       | 2.007(19) | Mo(8)-O(26)       | 2.28(2)   |
| Mo(9)-O(25)       | 1.698(19) | Mo(9)-O(23)       | 1.824(19) | Mo(9)-O(21)       | 2.296(19) |
| Mo(9)-O(39)       | 1.706(19) | Mo(9)-O(7)        | 2.041(19) | Mo(9)-O(32)       | 2.327(18) |
| P(1)-O(6)         | 1.505(19) | P(1)-O(11)        | 1.551(19) | P(2)-O(15)        | 1.509(19) |
| P(1)-O(4)         | 1.515(18) | P(1)-O(19)        | 1.585(18) | P(2)-O(18)        | 1.537(18) |
| P(2)-O(12)        | 1.544(19) | P(3)-O(24)        | 1.50(2)   | P(3)-O(28)        | 1.54(2)   |
| P(2)-O(32)        | 1.558(19) | P(3)-O(26)        | 1.51(2)   | P(3)-O(21)        | 1.57(2)   |
| Sr(1)-O(26)#1     | 2.565(19) | Sr(1)-O(18)#1     | 2.604(18) | Sr(1)-O(4)#1      | 2.671(18) |
| Sr(1)-O(26)       | 2.565(19) | Sr(1)-O(18)       | 2.604(18) | Sr(1)-O(4)        | 2.671(18) |
| Sr(1)-O(6)        | 2.679(18) | Sr(1)-O(6)#1      | 2.679(18) | Sr(1)-O(1)        | 2.85(3)   |
| Cu(1)-O(41)       | 2.063(18) | Cu(1)-O(24)       | 2.14(2)   | Cu(1)#2-O(25)     | 2.388(19) |
| Cu(1)-O(33)       | 2.38(2)   | Cu(1)-O(25)#4     | 2.388(19) |                   |           |
| O(36)-Mo(1)-O(16) | 102.0(9)  | O(37)-Mo(2)-O(27) | 103.8(9)  | O(30)-Mo(3)-O(31) | 103.1(9)  |

|                      |           |                       |           |                     |           |
|----------------------|-----------|-----------------------|-----------|---------------------|-----------|
| O(36)-Mo(1)-O(2)     | 98.7(11)  | O(37)-Mo(2)-O(9)      | 102.8(9)  | O(30)-Mo(3)-O(13)   | 103.1(9)  |
| O(36)-Mo(1)-O(27)    | 93.6(8)   | O(37)-Mo(2)-O(7)      | 96.3(8)   | O(30)-Mo(3)-O(7)    | 100.2(9)  |
| O(36)-Mo(1)-O(15)    | 94.9(9)   | O(37)-Mo(2)-O(32)     | 95.3(8)   | O(30)-Mo(3)-O(21)   | 98.8(8)   |
| O(36)-Mo(1)-O(6)     | 171.5(8)  | O(37)-Mo(2)-O(19)     | 169.5(8)  | O(30)-Mo(3)-O(19)   | 171.0(8)  |
| O(40)-Mo(4)-O(14)    | 100.8(10) | O(34)-Mo(5)-O(3)      | 98.2(10)  | O(35)-Mo(6)-O(8)    | 99.1(10)  |
| O(40)-Mo(4)-O(16)    | 101.0(9)  | O(34)-Mo(5)-O(5)      | 101.5(9)  | O(35)-Mo(6)-O(5)    | 102.1(9)  |
| O(40)-Mo(4)-O(10)    | 99.9(9)   | O(34)-Mo(5)-O(31)     | 94.4(8)   | O(35)-Mo(6)-O(10)   | 98.2(9)   |
| O(40)-Mo(4)-O(22)    | 94.7(8)   | O(34)-Mo(5)-O(28)     | 94.9(9)   | O(35)-Mo(6)-O(17)   | 94.4(8)   |
| O(40)-Mo(4)-O(11)    | 170.2(8)  | O(34)-Mo(5)-O(4)      | 173.0(8)  | O(35)-Mo(6)-O(11)   | 169.1(8)  |
| O(29)-Mo(7)-O(17)    | 106.3(9)  | O(38)-Mo(8)-O(33)     | 103.0(11) | O(25)-Mo(9)-O(39)   | 102.6(9)  |
| O(29)-Mo(7)-O(22)    | 105.7(9)  | O(38)-Mo(8)-O(1)      | 100.4(11) | O(25)-Mo(9)-O(23)   | 103.7(9)  |
| O(29)-Mo(7)-O(9)     | 93.6(8)   | O(38)-Mo(8)-O(23)     | 96.3(9)   | O(25)-Mo(9)-O(7)    | 96.7(8)   |
| O(29)-Mo(7)-O(13)    | 94.4(8)   | O(38)-Mo(8)-O(18)     | 92.4(9)   | O(25)-Mo(9)-O(21)   | 164.2(8)  |
| O(29)-Mo(7)-O(19)    | 160.6(8)  | O(38)-Mo(8)-O(26)     | 168.4(9)  | O(25)-Mo(9)-O(32)   | 87.0(8)   |
| O(6)-P(1)-O(4)       | 108.5(10) | O(15)-P(2)-O(18)      | 112.1(10) | O(24)-P(3)-O(26)    | 112.9(13) |
| O(6)-P(1)-O(11)      | 111.7(10) | O(15)-P(2)-O(12)      | 109.7(10) | O(24)-P(3)-O(28)    | 107.1(12) |
| O(6)-P(1)-O(19)      | 108.4(10) | O(15)-P(2)-O(32)      | 112.7(10) | O(24)-P(3)-O(21)    | 109.1(12) |
| O(26)#1-Sr(1)-O(26)  | 82.5(9)   | O(26)#1-Sr(1)-O(18)#1 | 65.1(6)   | O(26)#1-Sr(1)-O(18) | 115.3(6)  |
| O(26)#1-Sr(1)-O(4)#1 | 73.0(6)   | O(26)#1-Sr(1)-O(4)    | 119.5(6)  | O(26)#1-Sr(1)-O(6)  | 170.2(6)  |
| O(26)#1-Sr(1)-O(6)#1 | 101.6(6)  | O(26)#1-Sr(1)-O(1)    | 58.5(6)   | O(41)-Cu(1)-O(24)   | 170.7(13) |
| O(41)-Cu(1)-O(33)    | 98.5(13)  | O(41)-Cu(1)-O(25)#4   | 89.0(12)  |                     |           |

Symmetry transformations used to generate equivalent atoms: #1 -x,-y,-z; #2 -x+1/2,-y+1/2,-z

**Table S2** Selected bond lengths (Å) and bond angles (°) of compound **2**

|              |          |              |          |              |                 |
|--------------|----------|--------------|----------|--------------|-----------------|
| Mo(1)-O(29)  | 1.681(5) | Mo(1)-O(63)  | 1.884(5) | Mo(1)-O(12)  | 1.883(5)        |
| Mo(1)-O(9)   | 1.951(5) | Mo(1)-O(64)  | 2.097(5) | Mo(1)-O(19)  | 2.301(5)        |
| Mo(2)-O(11)  | 1.690(5) | Mo(2)-O(64)  | 1.790(5) | Mo(2)-O(3)   | 1.797(5)        |
| Mo(2)-O(71)  | 2.077(5) | Mo(2)-O(44)  | 2.094(5) | Mo(2)-O(13)  | 2.418(4)        |
| Mo(3)-O(55)  | 1.680(5) | Mo(3)-O(7)   | 1.874(5) | Mo(3)-O(5)   | 1.893(5)        |
| Mo(3)-O(60)  | 2.028(5) | Mo(3)-O(24)  | 2.038(5) | Mo(3)-O(6)   | 2.221(5)        |
| Mo(4)-O(27)  | 1.681(5) | Mo(4)-O(34)  | 1.780(5) | Mo(4)-O(71)  | 1.806(5)        |
| Mo(4)-O(42)  | 2.072(5) | Mo(4)-O(28)  | 2.126(5) | Mo(4)-O(13)  | 2.431(5)        |
| Mo(5)-O(43)  | 1.675(5) | Mo(5)-O(2)   | 1.877(5) | Mo(5)-O(49)  | 1.891(5)        |
| Mo(5)-O(14)  | 1.920(5) | Mo(5)-O(56)  | 2.123(5) | Mo(5)-O(21)  | 2.290(5)        |
| Mo(6)-O(65)  | 1.684(5) | Mo(6)-O(60)  | 1.781(5) | Mo(6)-O(44)  | 1.795(5)        |
| Mo(6)-O(42)  | 2.070(5) | Mo(6)-O(52)  | 2.143(5) | Mo(6)-O(13)  | 2.417(5)        |
| Mo(7)-O(38)  | 1.671(5) | Mo(7)-O(12)  | 1.878(5) | Mo(7)-O(8)   | 1.892(5)        |
| Mo(7)-O(14)  | 1.912(5) | Mo(7)-O(18)  | 2.115(5) | Mo(7)-O(21)  | 2.315(5)        |
| Mo(8)-O(69)  | 1.695(5) | Mo(8)-O(30)  | 2.149(5) | Mo(8)-O(39)  | 1.791(5)        |
| Mo(8)-O(37)  | 2.064(5) | Mo(8)-O(59)  | 102.0(5) | Mo(8)-O(16)  | 2.419(5)        |
| Mo(9)-O(51)  | 1.677(5) | Mo(9)-O(7)   | 1.857(5) | Mo(9)-O(49)  | Mo(9)- 1.877(5) |
| Mo(9)-O(32)  | 2.045(5) | Mo(9)-O(48)  | 2.070(5) | Mo(9)-O(41)  | 2.239(4)        |
| Mo(10)-O(62) | 1.688(5) | Mo(10)-O(5)  | 1.875(5) | Mo(10)-O(2)  | 1.887(5)        |
| Mo(10)-O(9)  | 1.967(5) | Mo(10)-O(3)  | 2.102(5) | Mo(10)-O(19) | 2.284(5)        |
| Mo(11)-O(58) | 1.722(5) | Mo(11)-O(36) | 1.722(5) | Mo(11)-O(1)  | 1.911(4)        |
| Mo(11)-O(15) | 1.936(5) | Mo(11)-O(10) | 2.208(5) | Mo(11)-Sr(1) | 3.6336(9)       |
| Mo(12)-O(68) | 1.683(5) | Mo(12)-O(32) | 1.779(5) | Mo(12)-O(67) | 1.797(5)        |
| Mo(12)-O(37) | 2.074(5) | Mo(12)-O(22) | 2.147(5) | Mo(12)-O(22) | 2.147(5)        |
| Mo(13)-O(45) | 1.695(5) | Mo(13)-O(46) | 1.705(6) | Mo(13)-O(1)  | 1.897(4)        |
| Mo(13)-O(40) | 1.958(5) | Mo(13)-O(26) | 2.286(5) | Mo(13)-O(20) | 2.300(5)        |
| Mo(14)-O(33) | 1.673(5) | Mo(14)-O(4)  | 1.873(5) | Mo(14)-O(63) | 1.877(5)        |
| Mo(14)-O(34) | 2.031(5) | Mo(14)-O(47) | 2.065(5) | Mo(14)-O(17) | 2.221(5)        |
| Mo(15)-O(61) | 1.696(5) | Mo(15)-O(31) | 1.699(6) | Mo(15)-O(40) | 1.855(5)        |
| Mo(15)-O(37) | 2.036(5) | Mo(15)-O(59) | 2.357(5) | Mo(15)-O(22) | 2.360(5)        |
| Mo(16)-O(66) | 1.694(5) | Mo(16)-O(56) | 1.790(5) | Mo(16)-O(18) | 1.791(5)        |

|                    |            |                    |            |                    |            |
|--------------------|------------|--------------------|------------|--------------------|------------|
| Mo(16)-O(39)       | 2.091(5)   | Mo(16)-O(67)       | 2.105(5)   | Mo(16)-O(16)       | 2.411(5)   |
| Mo(17)-O(75)       | 1.687(6)   | Mo(17)-O(74)       | 1.693(6)   | Mo(17)-O(15)       | 1.849(5)   |
| Mo(17)-O(42)       | 2.018(4)   | Mo(17)-O(52)       | 2.347(5)   | Mo(17)-O(28)       | 2.399(5)   |
| Mo(18)-O(73)       | 1.671(5)   | Mo(18)-O(4)        | 1.860(5)   | Mo(18)-O(8)        | 1.874(5)   |
| Mo(18)-O(30)       | 2.053(5)   | Mo(18)-O(35)       | 2.083(5)   | Mo(18)-O(23)       | 2.230(5)   |
| P(1)-O(23)         | 1.509(5)   | P(1)-O(41)         | 1.516(5)   | P(2)-O(17)         | 1.514(5)   |
| P(1)-O(21)         | 1.536(4)   | P(1)-O(16)         | 1.577(4)   | P(2)-O(6)          | 1.522(5)   |
| P(2)-O(19)         | 1.539(4)   | P(2)-O(13)         | 1.567(4)   | P(3)-O(70)         | 1.510(5)   |
| P(3)-O(10)         | 1.534(5)   | P(3)-O(47)         | 1.550(5)   | P(3)-O(28)         | 1.564(5)   |
| P(4)-O(20)         | 1.514(5)   | P(4)-O(48)         | 1.523(5)   | P(5)-O(25)         | 1.517(5)   |
| P(4)-O(22)         | 1.551(5)   | P(4)-O(57)         | 1.572(5)   | P(5)-O(24)         | 1.529(5)   |
| P(5)-O(50)         | 1.536(5)   | P(5)-O(52)         | 1.570(5)   | P(6)-O(35)         | 1.512(5)   |
| P(6)-O(26)         | 1.513(5)   | P(6)-O(59)         | 1.549(5)   | P(6)-O(72)         | 1.587(5)   |
| Sr(1)-O(50)        | 2.528(5)   | Sr(1)-O(10)        | 2.560(5)   | Sr(1)-O(26)        | 2.585(5)   |
| Sr(1)-O(6)         | 2.627(5)   | Sr(1)-O(41)        | 2.626(5)   | Sr(1)-O(20)        | 2.630(5)   |
| Sr(1)-O(23)        | 2.644(4)   | Sr(1)-O(17)        | 2.649(5)   | Sr(1)-O(1)         | 2.896(4)   |
| Fe(1)-O(70)#1      | 2.039(5)   | Fe(1)-O(70)#1      | 2.039(5)   | Fe(1)-O(25)        | 2.053(5)   |
| Fe(1)-O(58)        | 2.122(5)   | Fe(1)-O(36)#1      | 2.151(5)   | Fe(1)-O(54)        | 2.178(5)   |
| Fe(1)-O(53)        | 2.210(5)   |                    |            |                    |            |
| O(29)-Mo(1)-O(63)  | 103.2(2)   | O(11)-Mo(2)-O(64)  | 103.6(3)   | O(55)-Mo(3)-O(7)   | 99.2(2)    |
| O(29)-Mo(1)-O(12)  | 100.4(2)   | O(11)-Mo(2)-O(3)   | 105.0(3)   | O(55)-Mo(3)-O(5)   | 101.6(2)   |
| O(29)-Mo(1)-O(9)   | 99.0(2)    | O(11)-Mo(2)-O(71)  | 95.7(2)    | O(55)-Mo(3)-O(60)  | 93.9(2)    |
| O(29)-Mo(1)-O(64)  | 92.7(2)    | O(11)-Mo(2)-O(44)  | 96.5(2)    | O(55)-Mo(3)-O(24)  | 95.9(2)    |
| O(29)-Mo(1)-O(19)  | 168.2(2)   | O(11)-Mo(2)-O(13)  | 162.8(2)   | O(55)-Mo(3)-O(6)   | 173.3(2)   |
| O(27)-Mo(4)-O(34)  | 104.5(2)   | O(43)-Mo(5)-O(2)   | 100.8(2)   | O(65)-Mo(6)-O(60)  | 104.5(3)   |
| O(27)-Mo(4)-O(71)  | 101.9(2)   | O(43)-Mo(5)-O(49)  | 101.0(2)   | O(65)-Mo(6)-O(44)  | 102.0(2)   |
| O(27)-Mo(4)-O(42)  | 99.2(2)    | O(43)-Mo(5)-O(14)  | 101.1(2)   | O(65)-Mo(6)-O(42)  | 98.7(2)    |
| O(27)-Mo(4)-O(28)  | 96.8(2)    | O(43)-Mo(5)-O(56)  | 91.9(2)    | O(65)-Mo(6)-O(52)  | 96.4(2)    |
| O(27)-Mo(4)-O(13)  | 170.3(2)   | O(43)-Mo(5)-O(21)  | 168.6(2)   | O(65)-Mo(6)-O(13)  | 170.3(2)   |
| O(38)-Mo(7)-O(12)  | 100.7(2)   | O(69)-Mo(8)-O(30)  | 105.2(3)   | O(51)-Mo(9)-O(7)   | 98.6(2)    |
| O(38)-Mo(7)-O(8)   | 101.3(2)   | O(69)-Mo(8)-O(39)  | 103.2(2)   | O(51)-Mo(9)-O(49)  | 101.6(2)   |
| O(38)-Mo(7)-O(14)  | 102.0(2)   | O(69)-Mo(8)-O(37)  | 98.0(2)    | O(51)-Mo(9)-O(32)  | 94.6(2)    |
| O(38)-Mo(7)-O(18)  | 93.1(2)    | O(69)-Mo(8)-O(59)  | 96.0(2)    | O(51)-Mo(9)-O(48)  | 95.6(2)    |
| O(38)-Mo(7)-O(21)  | 169.8(2)   | O(69)-Mo(8)-O(16)  | 170.2(2)   | O(51)-Mo(9)-O(41)  | 172.8(2)   |
| O(62)-Mo(10)-O(5)  | 101.6(2)   | O(58)-Mo(11)-O(36) | 103.5(2)   | O(68)-Mo(12)-O(32) | 104.3(3)   |
| O(62)-Mo(10)-O(2)  | 101.6(2)   | O(58)-Mo(11)-O(1)  | 97.7(2)    | O(68)-Mo(12)-O(67) | 103.5(2)   |
| O(62)-Mo(10)-O(9)  | 99.2(2)    | O(58)-Mo(11)-O(15) | 96.4(2)    | O(68)-Mo(12)-O(37) | 97.5(2)    |
| O(62)-Mo(10)-O(3)  | 91.6(2)    | O(58)-Mo(11)-O(10) | 165.6(2)   | O(68)-Mo(12)-O(22) | 96.1(2)    |
| O(62)-Mo(10)-O(19) | 167.7(2)   | O(58)-Mo(11)-O(50) | 89.8(2)    | O(68)-Mo(12)-O(16) | 170.1(2)   |
| O(45)-Mo(13)-O(46) | 103.6(3)   | O(33)-Mo(14)-O(4)  | 99.5(2)    | O(61)-Mo(15)-O(31) | 102.7(3)   |
| O(45)-Mo(13)-O(1)  | 100.1(2)   | O(33)-Mo(14)-O(63) | 101.3(2)   | O(61)-Mo(15)-O(40) | 102.9(3)   |
| O(45)-Mo(13)-O(40) | 98.0(2)    | O(33)-Mo(14)-O(34) | 93.6(2)    | O(61)-Mo(15)-O(37) | 99.7(2)    |
| O(45)-Mo(13)-O(26) | 168.2(2)   | O(33)-Mo(14)-O(47) | 95.4(2)    | O(61)-Mo(15)-O(59) | 166.1(2)   |
| O(45)-Mo(13)-O(20) | 91.1(2)    | O(33)-Mo(14)-O(17) | 173.3(2)   | O(61)-Mo(15)-O(22) | 86.5(2)    |
| O(66)-Mo(16)-O(56) | 105.0(3)   | O(75)-Mo(17)-O(74) | 102.2(3)   | O(73)-Mo(18)-O(4)  | 98.8(2)    |
| O(66)-Mo(16)-O(18) | 105.7(3)   | O(75)-Mo(17)-O(15) | 103.4(3)   | O(73)-Mo(18)-O(8)  | 101.1(2)   |
| O(66)-Mo(16)-O(39) | 95.8(2)    | O(75)-Mo(17)-O(42) | 102.1(2)   | O(73)-Mo(18)-O(30) | 94.7(2)    |
| O(66)-Mo(16)-O(67) | 94.8(2)    | O(75)-Mo(17)-O(52) | 85.8(2)    | O(73)-Mo(18)-O(35) | 94.8(2)    |
| O(66)-Mo(16)-O(16) | 161.8(2)   | O(75)-Mo(17)-O(28) | 169.0(2)   | O(73)-Mo(18)-O(23) | 172.7(2)   |
| O(23)-P(1)-O(41)   | 107.5(3)   | O(17)-P(2)-O(6)    | 107.9(2)   | O(70)-P(3)-O(10)   | 109.7(3)   |
| O(23)-P(1)-O(21)   | 111.2(3)   | O(17)-P(2)-O(19)   | 110.6(3)   | O(70)-P(3)-O(47)   | 108.3(3)   |
| O(23)-P(1)-O(16)   | 109.8(3)   | O(17)-P(2)-O(13)   | 110.0(3)   | O(70)-P(3)-O(28)   | 111.2(3)   |
| O(20)-P(4)-O(48)   | 111.7(3)   | O(25)-P(5)-O(24)   | 108.2(3)   | O(35)-P(6)-O(26)   | 112.6(3)   |
| O(20)-P(4)-O(22)   | 110.7(3)   | O(25)-P(5)-O(50)   | 109.9(3)   | O(35)-P(6)-O(59)   | 112.9(3)   |
| O(20)-P(4)-O(57)   | 106.7(3)   | O(25)-P(5)-O(52)   | 110.7(3)   | O(35)-P(6)-O(72)   | 105.3(3)   |
| O(50)-Sr(1)-O(10)  | 64.70(15)  | O(50)-Sr(1)-O(26)  | 114.37(15) | O(50)-Sr(1)-O(6)   | 73.87(14)  |
| O(50)-Sr(1)-O(41)  | 120.94(15) | O(50)-Sr(1)-O(20)  | 79.79(15)  | O(50)-Sr(1)-O(23)  | 173.10(15) |



|                     |            |                     |           |                       |         |
|---------------------|------------|---------------------|-----------|-----------------------|---------|
| O(50)-Sr(1)-O(17)   | 102.28(15) | O(50)-Sr(1)-O(1)    | 57.98(14) |                       |         |
| O(70)#1-Fe(1)-O(58) | 88.8(2)    | O(70)#1-Fe(1)-O(25) | 178.2(2)  | O(70)#1-Fe(1)-O(36)#1 | 91.4(2) |
| O(70)#1-Fe(1)-O(54) | 82.7(2)    | O(70)#1-Fe(1)-O(53) | 99.9(2)   |                       |         |

Symmetry transformations used to generate equivalent atoms: #1 -x,-y,-z; #2 -x+1/2,-y+1/2,-z

**Table S3** Selected bond lengths (Å) and bond angles (°) of compound **3**

|               |          |              |          |               |          |
|---------------|----------|--------------|----------|---------------|----------|
| Mo(1)-O(47)   | 1.695(8) | Mo(2)-O(29)  | 1.705(8) | Mo(3)-O(8)    | 1.696(7) |
| Mo(1)-O(6)    | 1.897(7) | Mo(2)-O(64)  | 1.800(8) | Mo(3)-O(70)   | 1.798(8) |
| Mo(1)-O(67)   | 1.907(8) | Mo(2)-O(74)  | 1.820(8) | Mo(3)-O(3)    | 1.807(8) |
| Mo(1)-O(12)   | 1.965(8) | Mo(2)-O(43)  | 2.091(7) | Mo(3)-O(33)   | 2.087(8) |
| Mo(1)-O(70)   | 2.124(8) | Mo(2)-O(25)  | 2.143(7) | Mo(3)-O(74)   | 2.090(8) |
| Mo(1)-O(15)   | 2.317(8) | Mo(2)-O(7)   | 2.440(7) | Mo(3)-O(7)    | 2.431(6) |
| Mo(4)-O(30)   | 1.739(7) | Mo(5)-O(48)  | 1.689(8) | Mo(6)-O(45)   | 1.701(8) |
| Mo(4)-O(71)   | 1.747(8) | Mo(5)-O(11)  | 1.879(7) | Mo(6)-O(2)    | 1.895(7) |
| Mo(4)-O(1)    | 1.928(6) | Mo(5)-O(18)  | 1.898(8) | Mo(6)-O(18)   | 1.903(8) |
| Mo(4)-O(44)   | 1.935(7) | Mo(5)-O(14)  | 2.054(7) | Mo(6)-O(12)   | 1.977(8) |
| Mo(4)-O(22)   | 2.232(7) | Mo(5)-O(20)  | 2.059(7) | Mo(6)-O(3)    | 2.121(7) |
| Mo(4)-O(5)    | 2.239(7) | Mo(5)-O(10)  | 2.258(8) | Mo(6)-O(15)   | 2.306(8) |
| Mo(7)-O(37)   | 1.689(8) | Mo(8)-O(63)  | 1.707(8) | Mo(9)-O(52)   | 1.690(8) |
| Mo(7)-O(51)   | 1.895(8) | Mo(8)-O(57)  | 1.798(8) | Mo(9)-O(31)   | 1.794(8) |
| Mo(7)-O(2)    | 1.901(7) | Mo(8)-O(53)  | 1.801(8) | Mo(9)-O(49)   | 1.814(8) |
| Mo(7)-O(17)   | 1.947(8) | Mo(8)-O(24)  | 2.081(8) | Mo(9)-O(24)   | 2.084(8) |
| Mo(7)-O(59)   | 2.142(7) | Mo(8)-O(62)  | 2.186(7) | Mo(9)-O(23)   | 2.179(7) |
| Mo(7)-O(40)   | 2.318(7) | Mo(8)-O(4)   | 2.433(7) | Mo(9)-O(4)    | 2.425(7) |
| Mo(10)-O(55)  | 1.693(8) | Mo(11)-O(34) | 1.693(8) | Mo(12)-O(66)  | 1.694(9) |
| Mo(10)-O(9)   | 1.884(7) | Mo(11)-O(50) | 1.725(9) | Mo(12)-O(6)   | 1.898(7) |
| Mo(10)-O(67)  | 1.891(8) | Mo(11)-O(1)  | 1.918(6) | Mo(12)-O(27)  | 1.910(8) |
| Mo(10)-O(64)  | 2.043(8) | Mo(11)-O(39) | 1.954(7) | Mo(12)-O(17)  | 1.929(8) |
| Mo(10)-O(28)  | 2.085(7) | Mo(11)-O(26) | 2.302(8) | Mo(12)-O(16)  | 2.146(8) |
| Mo(10)-O(13)  | 2.240(7) | Mo(11)-O(19) | 2.305(7) | Mo(12)-O(40)  | 2.328(7) |
| Mo(13)-O(38)  | 1.710(8) | Mo(14)-O(35) | 1.689(8) | Mo(15)-O(56)  | 1.704(8) |
| Mo(13)-O(60)  | 1.711(8) | Mo(14)-O(14) | 1.784(8) | Mo(15)-O(16)  | 1.793(8) |
| Mo(13)-O(39)  | 1.892(7) | Mo(14)-O(33) | 1.811(8) | Mo(15)-O(59)  | 1.798(8) |
| Mo(13)-O(24)  | 2.054(7) | Mo(14)-O(43) | 2.075(7) | Mo(15)-O(57)  | 2.106(9) |
| Mo(13)-O(23)  | 2.369(8) | Mo(14)-O(61) | 2.151(8) | Mo(15)-O(49)  | 2.130(8) |
| Mo(13)-O(62)  | 2.369(8) | Mo(14)-O(7)  | 2.442(7) | Mo(15)-O(4)   | 2.437(7) |
| Mo(16)-O(54)  | 1.688(8) | Mo(17)-O(68) | 1.706(9) | Mo(18)-O(75)  | 1.690(8) |
| Mo(16)-O(11)  | 1.882(7) | Mo(17)-O(73) | 1.712(9) | Mo(18)-O(9)   | 1.884(7) |
| Mo(16)-O(51)  | 1.902(8) | Mo(17)-O(44) | 1.884(7) | Mo(18)-O(27)  | 1.887(8) |
| Mo(16)-O(31)  | 2.058(7) | Mo(17)-O(43) | 2.053(7) | Mo(18)-O(53)  | 2.072(7) |
| Mo(16)-O(21)  | 2.093(7) | Mo(17)-O(61) | 2.389(8) | Mo(18)-O(36)  | 2.106(8) |
| Mo(16)-O(41)  | 2.261(7) | Mo(17)-O(25) | 2.422(8) | Mo(18)-O(42)  | 2.248(7) |
| P(1)-O(42)    | 1.529(8) | P(2)-O(13)   | 1.519(8) | P(3)-O(46)    | 1.519(8) |
| P(1)-O(41)    | 1.534(8) | P(2)-O(10)   | 1.531(8) | P(3)-O(20)    | 1.537(8) |
| P(1)-O(40)    | 1.549(7) | P(2)-O(15)   | 1.548(7) | P(3)-O(5)     | 1.550(7) |
| P(1)-O(4)     | 1.586(7) | P(2)-O(7)    | 1.585(6) | P(3)-O(61)    | 1.577(8) |
| P(4)-O(21)    | 1.527(8) | P(5)-O(72)   | 1.520(8) | P(6)-O(26)    | 1.533(8) |
| P(4)-O(19)    | 1.539(8) | P(5)-O(22)   | 1.542(8) | P(6)-O(36)    | 1.521(8) |
| P(4)-O(23)    | 1.563(8) | P(5)-O(28)   | 1.567(8) | P(6)-O(62)    | 1.557(8) |
| P(4)-O(58)    | 1.576(8) | P(5)-O(25)   | 1.582(8) | P(6)-O(65)    | 1.607(8) |
| Sr(1)-O(5)    | 2.524(7) | Sr(1)-O(22)  | 2.582(7) | Sr(1)-O(26)   | 2.613(7) |
| Sr(1)-O(10)   | 2.620(7) | Sr(1)-O(41)  | 2.636(7) | Sr(1)-O(19)   | 2.646(8) |
| Sr(1)-O(42)   | 2.670(7) | Sr(1)-O(13)  | 2.680(8) | Sr(1)-O(1)    | 2.908(7) |
| Co(1)-O(72)#1 | 2.051(7) | Co(1)-O(46)  | 2.072(8) | Co(1)-O(71)#1 | 2.134(8) |
| Co(1)-O(30)   | 2.138(7) | Co(1)-O(69)  | 2.169(7) | Co(1)-O(32)   | 2.188(7) |

|                     |          |                       |          |                     |          |
|---------------------|----------|-----------------------|----------|---------------------|----------|
| O(47)-Mo(1)-O(6)    | 100.1(4) | O(29)-Mo(2)-O(64)     | 104.4(4) | O(8)-Mo(3)-O(70)    | 104.2(4) |
| O(47)-Mo(1)-O(67)   | 103.1(4) | O(29)-Mo(2)-O(74)     | 102.1(4) | O(8)-Mo(3)-O(3)     | 105.6(4) |
| O(47)-Mo(1)-O(12)   | 99.1(4)  | O(29)-Mo(2)-O(43)     | 99.7(3)  | O(8)-Mo(3)-O(33)    | 96.6(4)  |
| O(47)-Mo(1)-O(70)   | 93.2(3)  | O(29)-Mo(2)-O(25)     | 97.0(3)  | O(8)-Mo(3)-O(74)    | 95.0(4)  |
| O(47)-Mo(1)-O(15)   | 168.0(3) | O(29)-Mo(2)-O(7)      | 170.4(3) | O(8)-Mo(3)-O(7)     | 161.9(3) |
| O(30)-Mo(4)-O(71)   | 103.9(3) | O(48)-Mo(5)-O(11)     | 99.2(4)  | O(45)-Mo(6)-O(2)    | 101.1(4) |
| O(30)-Mo(4)-O(1)    | 98.3(3)  | O(48)-Mo(5)-O(18)     | 102.0(4) | O(45)-Mo(6)-O(18)   | 101.8(4) |
| O(30)-Mo(4)-O(44)   | 95.6(3)  | O(48)-Mo(5)-O(14)     | 93.9(3)  | O(45)-Mo(6)-O(12)   | 99.5(4)  |
| O(30)-Mo(4)-O(22)   | 165.5(3) | O(48)-Mo(5)-O(20)     | 95.9(4)  | O(45)-Mo(6)-O(3)    | 92.1(3)  |
| O(30)-Mo(4)-O(5)    | 90.0(3)  | O(48)-Mo(5)-O(10)     | 173.0(3) | O(45)-Mo(6)-O(15)   | 167.7(3) |
| O(37)-Mo(7)-O(51)   | 101.3(4) | O(63)-Mo(8)-O(57)     | 103.1(4) | O(52)-Mo(9)-O(31)   | 104.3(4) |
| O(37)-Mo(7)-O(2)    | 100.3(4) | O(63)-Mo(8)-O(53)     | 104.5(4) | O(52)-Mo(9)-O(49)   | 103.2(4) |
| O(37)-Mo(7)-O(17)   | 101.0(4) | O(63)-Mo(8)-O(24)     | 99.1(3)  | O(52)-Mo(9)-O(24)   | 97.7(4)  |
| O(37)-Mo(7)-O(59)   | 92.6(4)  | O(63)-Mo(8)-O(62)     | 96.2(3)  | O(52)-Mo(9)-O(23)   | 95.9(4)  |
| O(37)-Mo(7)-O(40)   | 168.8(3) | O(63)-Mo(8)-O(4)      | 170.8(3) | O(52)-Mo(9)-O(4)    | 169.9(3) |
| O(55)-Mo(10)-O(9)   | 99.7(4)  | O(34)-Mo(11)-O(50)    | 104.0(4) | O(66)-Mo(12)-O(6)   | 100.2(4) |
| O(55)-Mo(10)-O(67)  | 100.8(4) | O(34)-Mo(11)-O(1)     | 100.3(4) | O(66)-Mo(12)-O(27)  | 101.5(4) |
| O(55)-Mo(10)-O(64)  | 93.1(4)  | O(34)-Mo(11)-O(39)    | 98.0(4)  | O(66)-Mo(12)-O(17)  | 101.6(4) |
| O(55)-Mo(10)-O(28)  | 95.3(4)  | O(34)-Mo(11)-O(26)    | 168.1(4) | O(66)-Mo(12)-O(16)  | 93.5(4)  |
| O(55)-Mo(10)-O(13)  | 172.9(3) | O(34)-Mo(11)-O(19)    | 90.9(4)  | O(66)-Mo(12)-O(40)  | 170.2(3) |
| O(38)-Mo(13)-O(60)  | 103.1(4) | O(35)-Mo(14)-O(14)    | 104.7(4) | O(56)-Mo(15)-O(16)  | 105.3(4) |
| O(38)-Mo(13)-O(39)  | 104.4(4) | O(35)-Mo(14)-O(33)    | 102.4(4) | O(56)-Mo(15)-O(59)  | 105.4(4) |
| O(38)-Mo(13)-O(24)  | 99.3(4)  | O(35)-Mo(14)-O(43)    | 98.6(3)  | O(56)-Mo(15)-O(57)  | 95.9(3)  |
| O(38)-Mo(13)-O(23)  | 166.4(4) | O(35)-Mo(14)-O(61)    | 97.1(3)  | O(56)-Mo(15)-O(49)  | 94.7(3)  |
| O(38)-Mo(13)-O(62)  | 86.8(4)  | O(35)-Mo(14)-O(7)     | 169.6(3) | O(56)-Mo(15)-O(4)   | 161.7(3) |
| O(54)-Mo(16)-O(11)  | 98.9(4)  | O(68)-Mo(17)-O(73)    | 101.2(5) | O(75)-Mo(18)-O(9)   | 98.6(4)  |
| O(54)-Mo(16)-O(51)  | 102.2(4) | O(68)-Mo(17)-O(44)    | 103.7(4) | O(75)-Mo(18)-O(27)  | 100.5(4) |
| O(54)-Mo(16)-O(31)  | 94.2(4)  | O(68)-Mo(17)-O(43)    | 101.9(4) | O(75)-Mo(18)-O(53)  | 94.6(4)  |
| O(54)-Mo(16)-O(21)  | 95.6(4)  | O(68)-Mo(17)-O(61)    | 86.6(4)  | O(75)-Mo(18)-O(36)  | 95.2(4)  |
| O(54)-Mo(16)-O(41)  | 172.0(3) | O(68)-Mo(17)-O(25)    | 169.3(4) | O(75)-Mo(18)-O(42)  | 173.2(3) |
| O(42)-P(1)-O(41)    | 107.1(4) | O(13)-P(2)-O(10)      | 107.5(4) | O(46)-P(3)-O(20)    | 108.0(5) |
| O(42)-P(1)-O(40)    | 111.1(4) | O(13)-P(2)-O(15)      | 111.4(4) | O(46)-P(3)-O(5)     | 111.1(4) |
| O(42)-P(1)-O(4)     | 109.8(4) | O(13)-P(2)-O(7)       | 109.2(4) | O(46)-P(3)-O(61)    | 111.3(4) |
| O(21)-P(4)-O(19)    | 111.4(4) | O(72)-P(5)-O(22)      | 110.5(4) | O(36)-P(6)-O(26)    | 113.3(4) |
| O(21)-P(4)-O(23)    | 112.2(4) | O(72)-P(5)-O(28)      | 108.4(4) | O(36)-P(6)-O(62)    | 112.9(4) |
| O(21)-P(4)-O(58)    | 109.1(5) | O(72)-P(5)-O(25)      | 111.5(4) | O(36)-P(6)-O(65)    | 105.1(5) |
| O(5)-Sr(1)-O(22)    | 64.9(2)  | O(5)-Sr(1)-O(26)      | 114.1(2) | O(5)-Sr(1)-O(10)    | 74.1(2)  |
| O(5)-Sr(1)-O(41)    | 121.7(2) | O(5)-Sr(1)-O(19)      | 80.1(2)  | O(5)-Sr(1)-O(42)    | 173.7(2) |
| O(5)-Sr(1)-O(13)    | 102.0(2) | O(5)-Sr(1)-O(1)       | 58.2(2)  |                     |          |
| O(72)#1-Co(1)-O(46) | 178.1(3) | O(72)#1-Co(1)-O(71)#1 | 91.2(3)  | O(72)#1-Co(1)-O(30) | 88.7(3)  |
| O(72)#1-Co(1)-O(69) | 81.5(3)  | O(72)#1-Co(1)-O(32)   | 99.3(3)  |                     |          |

Symmetry transformations used to generate equivalent atoms: #1 -x,-y,-z; #2 -x+1/2,-y+1/2,-z

**Table S4** Selected bond lengths (Å) and bond angles (°) of compound **4**

|             |          |             |           |             |           |
|-------------|----------|-------------|-----------|-------------|-----------|
| Mo(1)-O(45) | 1.685(7) | Mo(1)-O(7)  | 1.874(6)  | Mo(1)-O(47) | 1.883(7)  |
| Mo(1)-O(10) | 1.959(7) | Mo(1)-O(56) | 2.099(7)  | Mo(1)-O(17) | 2.299(6)  |
| Mo(2)-O(15) | 1.682(6) | Mo(2)-O(56) | 1.787(7)  | Mo(2)-O(4)  | 1.800(7)  |
| Mo(2)-O(27) | 2.084(7) | Mo(2)-O(24) | 2.089(7)  | Mo(2)-O(9)  | 2.400(6)  |
| Mo(3)-O(23) | 1.685(7) | Mo(3)-O(30) | 2.117(6)  | Mo(3)-O(27) | 2.431(7)  |
| Mo(3)-O(61) | 2.069(7) | Mo(3)-O(52) | 2.704(11) | Mo(3)-O(9)  | 2.431(12) |
| Mo(4)-O(32) | 1.666(7) | Mo(4)-O(13) | 1.887(7)  | Mo(4)-O(7)  | 1.888(6)  |
| Mo(4)-O(73) | 1.911(7) | Mo(4)-O(12) | 2.115(6)  | Mo(4)-O(58) | 2.311(6)  |
| Mo(5)-O(29) | 1.727(7) | Mo(5)-O(57) | 1.727(7)  | Mo(5)-O(1)  | 1.908(6)  |
| Mo(5)-O(33) | 1.936(6) | Mo(5)-O(8)  | 2.220(7)  | Mo(5)-O(54) | 2.224(7)  |
| Mo(6)-O(40) | 1.680(7) | Mo(6)-O(3)  | 1.870(6)  | Mo(6)-O(6)  | 1.899(7)  |

|                    |                 |                    |          |                    |          |
|--------------------|-----------------|--------------------|----------|--------------------|----------|
| Mo(6)-O(55)        | 2.038(6)        | Mo(6)-O(39)        | 2.050(7) | Mo(6)-O(5)         | 2.233(7) |
| Mo(7)-O(50)        | 1.686(7)        | Mo(7)-O(31)        | 1.775(6) | Mo(7)-O(43)        | 1.789(7) |
| Mo(7)-O(19)        | 2.065(7)        | Mo(7)-O(59)        | 2.152(7) | Mo(7)-O(16)        | 2.418(6) |
| Mo(8)-O(62)        | 1.673(7)        | Mo(8)-O(3)         | 1.862(6) | Mo(8)-O(53)        | 1.870(7) |
| <b>Mo(8)-O(35)</b> | <b>2.060(6)</b> | Mo(8)-O(44)        | 2.072(7) | Mo(8)-O(36)        | 2.242(6) |
| Mo(9)-O(20)        | 1.678(7)        | Mo(9)-O(11)        | 1.865(6) | Mo(9)-O(47)        | 1.882(7) |
| Mo(9)-O(30)        | 2.041(7)        | Mo(9)-O(37)        | 2.076(6) | Mo(9)-O(14)        | 2.218(6) |
| Mo(10)-O(28)       | 1.687(7)        | Mo(10)-O(55)       | 1.772(7) | Mo(10)-O(24)       | 1.799(6) |
| Mo(10)-O(61)       | 2.068(7)        | Mo(10)-O(34)       | 2.143(6) | Mo(10)-O(9)        | 2.416(6) |
| Mo(11)-O(71)       | 1.693(8)        | Mo(11)-O(46)       | 1.709(8) | Mo(11)-O(1)        | 1.904(6) |
| Mo(11)-O(21)       | 1.955(6)        | Mo(11)-O(22)       | 2.292(7) | Mo(11)-O(26)       | 2.295(7) |
| Mo(12)-O(63)       | 1.686(7)        | Mo(12)-O(6)        | 1.870(7) | Mo(12)-O(2)        | 1.889(6) |
| Mo(12)-O(10)       | 1.959(7)        | Mo(12)-O(4)        | 2.099(7) | Mo(12)-O(17)       | 2.276(6) |
| Mo(13)-O(49)       | 1.684(7)        | Mo(13)-O(51)       | 1.697(7) | Mo(13)-O(21)       | 1.864(7) |
| Mo(13)-O(19)       | 2.044(7)        | Mo(13)-O(18)       | 2.358(6) | Mo(13)-O(59)       | 2.359(6) |
| Mo(14)-O(66)       | 1.693(7)        | Mo(14)-O(67)       | 1.791(7) | Mo(14)-O(12)       | 1.792(7) |
| Mo(14)-O(43)       | 2.093(7)        | Mo(14)-O(64)       | 2.120(7) | Mo(14)-O(16)       | 2.415(6) |
| Mo(15)-O(65)       | 1.673(7)        | Mo(15)-O(35)       | 1.764(7) | Mo(15)-O(64)       | 1.784(7) |
| Mo(15)-O(19)       | 2.061(7)        | Mo(15)-O(18)       | 2.152(7) | Mo(15)-O(16)       | 2.404(7) |
| Mo(16)-O(72)       | 1.671(7)        | Mo(16)-O(11)       | 1.870(6) | Mo(16)-O(13)       | 1.882(7) |
| Mo(16)-O(31)       | 2.058(6)        | Mo(16)-O(42)       | 2.084(7) | Mo(16)-O(38)       | 2.233(6) |
| Mo(17)-O(75)       | 1.696(7)        | Mo(17)-O(60)       | 1.696(8) | Mo(17)-O(33)       | 1.849(6) |
| Mo(17)-O(61)       | 2.027(6)        | Mo(17)-O(34)       | 2.347(7) | Mo(17)-O(52)       | 2.402(7) |
| Mo(18)-O(2)        | 1.876(6)        | Mo(18)-O(53)       | 1.899(7) | Mo(18)-O(58)       | 2.289(7) |
| Mo(18)-O(67)       | 2.121(6)        | Mo(18)-O(73)       | 1.910(7) | Mo(18)-O(74)       | 1.671(7) |
| P(1)-O(38)         | 1.514(7)        | P(2)-O(5)          | 1.520(7) | P(3)-O(39)         | 1.521(7) |
| P(1)-O(16)         | 1.576(6)        | P(2)-O(14)         | 1.518(6) | P(3)-O(25)         | 1.522(7) |
| P(1)-O(36)         | 1.521(7)        | P(2)-O(17)         | 1.537(6) | P(3)-O(54)         | 1.525(7) |
| P(1)-O(58)         | 1.541(6)        | P(2)-O(9)          | 1.578(6) | P(3)-O(34)         | 1.570(6) |
| P(4)-O(76)         | 1.497(7)        | P(5)-O(44)         | 1.517(7) | P(6)-O(26)         | 1.512(7) |
| P(4)-O(8)          | 1.529(7)        | P(5)-O(22)         | 1.522(7) | P(6)-O(42)         | 1.512(7) |
| P(4)-O(37)         | 1.547(7)        | P(5)-O(18)         | 1.551(7) | P(6)-O(59)         | 1.548(7) |
| P(4)-O(52)         | 1.570(7)        | P(5)-O(41)         | 1.577(7) | P(6)-O(70)         | 1.589(7) |
| Sr(1)-O(54)        | 2.532(6)        | Sr(1)-O(8)         | 2.573(7) | Sr(1)-O(26)        | 2.575(7) |
| Sr(1)-O(5)         | 2.609(6)        | Sr(1)-O(22)        | 2.614(6) | Sr(1)-O(36)        | 2.616(6) |
| Sr(1)-O(38)        | 2.648(6)        | Sr(1)-O(14)        | 2.656(6) | Sr(1)-O(1)         | 2.883(6) |
| Ni(1)-O(68)        | 2.058(7)        | Ni(1)-O(76)#1      | 2.060(7) | Ni(1)-O(57)#1      | 2.125(7) |
| Ni(1)-O(25)        | 2.063(7)        | Ni(1)-O(48)        | 2.094(7) | Ni(1)-O(29)        | 2.111(7) |
| O(45)-Mo(1)-O(7)   | 100.7(3)        | O(15)-Mo(2)-O(56)  | 103.9(4) | O(23)-Mo(3)-O(30)  | 104.1(3) |
| O(45)-Mo(1)-O(47)  | 103.2(3)        | O(15)-Mo(2)-O(4)   | 105.5(3) | O(23)-Mo(3)-O(27)  | 101.6(3) |
| O(45)-Mo(1)-O(10)  | 99.1(3)         | O(15)-Mo(2)-O(27)  | 95.4(3)  | O(23)-Mo(3)-O(61)  | 99.7(3)  |
| O(45)-Mo(1)-O(56)  | 92.8(3)         | O(15)-Mo(2)-O(24)  | 96.6(3)  | O(23)-Mo(3)-O(52)  | 97.0(3)  |
| O(45)-Mo(1)-O(17)  | 167.8(3)        | O(15)-Mo(2)-O(9)   | 162.6(3) | O(23)-Mo(3)-O(9)   | 170.5(3) |
| O(32)-Mo(4)-O(13)  | 101.6(3)        | O(29)-Mo(5)-O(57)  | 103.7(3) | O(40)-Mo(6)-O(3)   | 99.4(3)  |
| O(32)-Mo(4)-O(7)   | 100.7(3)        | O(29)-Mo(5)-O(1)   | 98.3(3)  | O(40)-Mo(6)-O(6)   | 101.7(3) |
| O(32)-Mo(4)-O(73)  | 101.9(3)        | O(29)-Mo(5)-O(33)  | 96.0(3)  | O(40)-Mo(6)-O(55)  | 94.0(3)  |
| O(32)-Mo(4)-O(12)  | 93.0(3)         | O(29)-Mo(5)-O(8)   | 165.8(3) | O(40)-Mo(6)-O(39)  | 96.0(3)  |
| O(32)-Mo(4)-O(58)  | 169.8(3)        | O(29)-Mo(5)-O(54)  | 89.8(3)  | O(40)-Mo(6)-O(5)   | 173.3(3) |
| O(50)-Mo(7)-O(31)  | 104.8(4)        | O(62)-Mo(8)-O(3)   | 98.9(3)  | O(20)-Mo(9)-O(11)  | 99.0(3)  |
| O(50)-Mo(7)-O(43)  | 102.8(3)        | O(62)-Mo(8)-O(53)  | 101.2(3) | O(20)-Mo(9)-O(47)  | 101.2(3) |
| O(50)-Mo(7)-O(19)  | 98.7(3)         | O(62)-Mo(8)-O(35)  | 94.4(3)  | O(20)-Mo(9)-O(30)  | 93.5(3)  |
| O(50)-Mo(7)-O(59)  | 96.1(3)         | O(62)-Mo(8)-O(44)  | 96.2(3)  | O(20)-Mo(9)-O(37)  | 95.6(3)  |
| O(50)-Mo(7)-O(16)  | 170.5(3)        | O(62)-Mo(8)-O(36)  | 172.9(3) | O(20)-Mo(9)-O(14)  | 173.2(3) |
| O(28)-Mo(10)-O(55) | 104.9(3)        | O(71)-Mo(11)-O(46) | 103.5(4) | O(63)-Mo(12)-O(6)  | 101.8(3) |
| O(28)-Mo(10)-O(24) | 101.7(3)        | O(71)-Mo(11)-O(1)  | 99.7(3)  | O(63)-Mo(12)-O(2)  | 101.4(3) |
| O(28)-Mo(10)-O(61) | 98.7(3)         | O(71)-Mo(11)-O(21) | 98.0(3)  | O(63)-Mo(12)-O(10) | 98.9(3)  |
| O(28)-Mo(10)-O(34) | 96.9(3)         | O(71)-Mo(11)-O(22) | 91.4(3)  | O(63)-Mo(12)-O(4)  | 91.8(3)  |

|                     |            |                    |          |                     |          |
|---------------------|------------|--------------------|----------|---------------------|----------|
| O(28)-Mo(10)-O(9)   | 170.0(3)   | O(71)-Mo(11)-O(26) | 167.8(3) | O(63)-Mo(12)-O(17)  | 167.3(3) |
| O(49)-Mo(13)-O(51)  | 103.1(4)   | O(66)-Mo(14)-O(67) | 105.2(3) | O(65)-Mo(15)-O(35)  | 104.1(3) |
| O(49)-Mo(13)-O(21)  | 104.5(4)   | O(66)-Mo(14)-O(12) | 105.0(3) | O(65)-Mo(15)-O(64)  | 103.3(3) |
| O(49)-Mo(13)-O(19)  | 99.5(3)    | O(66)-Mo(14)-O(43) | 95.7(3)  | O(65)-Mo(15)-O(19)  | 97.6(3)  |
| O(49)-Mo(13)-O(18)  | 166.0(3)   | O(66)-Mo(14)-O(64) | 95.2(3)  | O(65)-Mo(15)-O(18)  | 96.0(3)  |
| O(49)-Mo(13)-O(59)  | 86.6(3)    | O(66)-Mo(14)-O(16) | 162.0(3) | O(65)-Mo(15)-O(16)  | 169.9(3) |
| O(72)-Mo(16)-O(11)  | 98.8(3)    | O(75)-Mo(17)-O(60) | 102.1(4) | O(74)-Mo(18)-O(2)   | 100.7(3) |
| O(72)-Mo(16)-O(13)  | 100.9(3)   | O(75)-Mo(17)-O(33) | 102.6(3) | O(74)-Mo(18)-O(53)  | 101.4(3) |
| O(72)-Mo(16)-O(31)  | 94.5(3)    | O(75)-Mo(17)-O(61) | 102.6(3) | O(74)-Mo(18)-O(73)  | 100.9(3) |
| O(72)-Mo(16)-O(42)  | 94.9(3)    | O(75)-Mo(17)-O(34) | 86.1(3)  | O(74)-Mo(18)-O(67)  | 91.9(3)  |
| O(72)-Mo(16)-O(38)  | 172.3(3)   | O(75)-Mo(17)-O(52) | 169.2(3) | O(74)-Mo(18)-O(58)  | 168.4(3) |
| O(38)-P(1)-O(36)    | 106.9(4)   | O(38)-P(1)-O(58)   | 111.6(4) | O(38)-P(1)-O(16)    | 109.3(4) |
| O(14)-P(2)-O(5)     | 107.4(3)   | O(14)-P(2)-O(17)   | 111.5(4) | O(14)-P(2)-O(9)     | 109.7(4) |
| O(39)-P(3)-O(25)    | 107.9(4)   | O(39)-P(3)-O(54)   | 109.4(4) | O(39)-P(3)-O(34)    | 110.8(4) |
| O(76)-P(4)-O(8)     | 110.1(4)   | O(76)-P(4)-O(37)   | 107.9(4) | O(76)-P(4)-O(52)    | 111.8(4) |
| O(44)-P(5)-O(22)    | 111.4(4)   | O(44)-P(5)-O(18)   | 111.9(4) | O(44)-P(5)-O(41)    | 108.5(4) |
| O(26)-P(6)-O(42)    | 112.6(4)   | O(26)-P(6)-O(59)   | 109.4(4) | O(26)-P(6)-O(70)    | 108.4(4) |
| O(54)-Sr(1)-O(8)    | 64.8(2)    | O(54)-Sr(1)-O(26)  | 114.8(2) | O(54)-Sr(1)-O(5)    | 74.0(2)  |
| O(54)-Sr(1)-O(22)   | 80.2(2)    | O(54)-Sr(1)-O(36)  | 121.5(2) | O(54)-Sr(1)-O(38)   | 173.5(2) |
| O(54)-Sr(1)-O(14)   | 101.99(19) | O(54)-Sr(1)-O(1)   | 58.0(2)  | O(68)-Ni(1)-O(57)#1 | 94.6(3)  |
| O(68)-Ni(1)-O(76)#1 | 174.6(6)   | O(68)-Ni(1)-O(25)  | 97.9(3)  | O(68)-Ni(1)-O(48)   | 80.9(3)  |
| O(68)-Ni(1)-O(29)   | 90.7(3)    |                    |          |                     |          |

Symmetry transformations used to generate equivalent atoms: #1 -x,-y,-z; #2 -x+1/2,-y+1/2,-z

**Table S5** Selected bond lengths (Å) and bond angles (°) of compound **5**

|              |           |              |           |              |           |
|--------------|-----------|--------------|-----------|--------------|-----------|
| Mo(1)-O(46)  | 1.697(11) | Mo(1)-O(11)  | 1.772(10) | Mo(1)-O(40)  | 1.784(11) |
| Mo(1)-O(32)  | 2.056(10) | Mo(1)-O(49)  | 2.129(11) | Mo(1)-O(23)  | 2.418(11) |
| Mo(2)-O(65)  | 1.684(11) | Mo(2)-O(3)   | 1.866(11) | Mo(2)-O(28)  | 1.880(12) |
| Mo(2)-O(11)  | 2.037(10) | Mo(2)-O(69)  | 2.062(12) | Mo(2)-O(6)   | 2.196(10) |
| Mo(3)-O(61)  | 1.672(12) | Mo(3)-O(2)   | 1.879(10) | Mo(3)-O(8)   | 1.889(12) |
| Mo(3)-O(33)  | 2.021(11) | Mo(3)-O(47)  | 2.042(11) | Mo(3)-O(15)  | 2.202(10) |
| Mo(4)-O(66)  | 1.694(13) | Mo(4)-O(8)   | 1.868(12) | Mo(4)-O(1)   | 1.877(12) |
| Mo(4)-O(9)   | 1.951(11) | Mo(4)-O(42)  | 2.091(13) | Mo(4)-O(25)  | 2.297(11) |
| Mo(5)-O(44)  | 1.686(12) | Mo(5)-O(26)  | 1.750(11) | Mo(5)-O(38)  | 1.871(11) |
| Mo(5)-O(5)   | 1.988(10) | Mo(5)-O(10)  | 2.178(11) | Mo(5)-O(27)  | 2.231(10) |
| Mo(6)-O(72)  | 1.676(11) | Mo(6)-O(16)  | 1.769(11) | Mo(6)-O(29)  | 1.795(12) |
| Mo(6)-O(34)  | 2.064(12) | Mo(6)-O(14)  | 2.160(11) | Mo(6)-O(24)  | 2.395(11) |
| Mo(7)-O(30)  | 1.674(12) | Mo(7)-O(59)  | 1.783(11) | Mo(7)-O(56)  | 1.792(12) |
| Mo(7)-O(34)  | 2.059(12) | Mo(7)-O(60)  | 2.126(11) | Mo(7)-O(24)  | 2.404(10) |
| Mo(8)-O(55)  | 1.678(13) | Mo(8)-O(67)  | 1.729(13) | Mo(8)-O(71)  | 1.929(12) |
| Mo(8)-O(38)  | 1.936(11) | Mo(8)-O(52)  | 2.244(12) | Mo(8)-O(17)  | 2.305(10) |
| Mo(9)-O(50)  | 1.678(11) | Mo(9)-O(33)  | 1.790(11) | Mo(9)-O(22)  | 1.806(11) |
| Mo(9)-O(32)  | 2.068(11) | Mo(9)-O(13)  | 2.146(11) | Mo(9)-O(23)  | 2.410(10) |
| Mo(10)-O(70) | 1.671(12) | Mo(10)-O(1)  | 1.883(12) | Mo(10)-O(62) | 1.899(11) |
| Mo(10)-O(57) | 1.947(12) | Mo(10)-O(35) | 2.045(12) | Mo(10)-O(20) | 2.304(11) |
| Mo(11)-O(54) | 1.694(12) | Mo(11)-O(68) | 1.710(12) | Mo(11)-O(5)  | 1.840(11) |
| Mo(11)-O(32) | 2.059(11) | Mo(11)-O(49) | 2.296(10) | Mo(11)-O(13) | 2.323(10) |
| Mo(12)-O(63) | 1.676(12) | Mo(12)-O(21) | 1.864(13) | Mo(12)-O(3)  | 1.869(11) |
| Mo(12)-O(16) | 2.028(11) | Mo(12)-O(4)  | 2.056(12) | Mo(12)-O(37) | 2.256(10) |
| Mo(13)-O(36) | 1.665(11) | Mo(13)-O(62) | 1.858(11) | Mo(13)-O(2)  | 1.859(10) |
| Mo(13)-O(59) | 2.043(11) | Mo(13)-O(19) | 2.089(12) | Mo(13)-O(41) | 2.206(10) |
| Mo(14)-O(43) | 1.673(11) | Mo(14)-O(7)  | 1.879(11) | Mo(14)-O(28) | 1.891(12) |
| Mo(14)-O(9)  | 1.961(11) | Mo(14)-O(39) | 2.063(11) | Mo(14)-O(25) | 2.311(11) |
| Mo(15)-O(53) | 1.683(12) | Mo(15)-O(51) | 1.706(12) | Mo(15)-O(71) | 1.876(12) |
| Mo(15)-O(34) | 2.033(13) | Mo(15)-O(14) | 2.305(11) | Mo(15)-O(60) | 2.350(10) |

|                    |           |                    |           |                    |           |
|--------------------|-----------|--------------------|-----------|--------------------|-----------|
| Mo(16)-O(48)       | 1.691(12) | Mo(16)-O(39)       | 1.797(11) | Mo(16)-O(42)       | 1.799(12) |
| Mo(16)-O(40)       | 2.057(11) | Mo(16)-O(22)       | 2.104(11) | Mo(16)-O(23)       | 2.397(11) |
| Mo(17)-O(45)       | 1.684(12) | Mo(17)-O(7)        | 1.878(11) | Mo(17)-O(21)       | 1.884(13) |
| Mo(17)-O(57)       | 1.981(13) | Mo(17)-O(12)       | 2.068(11) | Mo(17)-O(20)       | 2.313(11) |
| Mo(18)-O(58)       | 1.668(12) | Mo(18)-O(12)       | 1.786(12) | Mo(18)-O(35)       | 1.813(13) |
| Mo(18)-O(29)       | 2.063(12) | Mo(18)-O(56)       | 2.093(12) | Mo(18)-O(24)       | 2.415(11) |
| P(1)-O(37)         | 1.507(11) | P(1)-O(20)         | 1.516(12) | P(2)-O(6)          | 1.518(11) |
| P(1)-O(41)         | 1.520(11) | P(1)-O(24)         | 1.581(11) | P(2)-O(25)         | 1.518(11) |
| P(2)-O(15)         | 1.531(10) | P(3)-O(18)         | 1.518(10) | P(3)-O(47)         | 1.531(11) |
| P(2)-O(23)         | 1.583(10) | P(3)-O(27)         | 1.526(10) | P(3)-O(13)         | 1.556(11) |
| P(4)-O(52)         | 1.509(12) | P(4)-O(64)         | 1.532(12) | P(5)-O(17)         | 1.494(11) |
| P(4)-O(4)          | 1.520(12) | P(4)-O(14)         | 1.557(11) | P(5)-O(19)         | 1.500(12) |
| P(5)-O(31)         | 1.551(11) | P(6)-O(69)         | 1.514(11) | P(6)-O(10)         | 1.522(10) |
| P(5)-O(60)         | 1.562(11) | P(6)-O(73)         | 1.515(11) | P(6)-O(49)         | 1.566(11) |
| Sr(1)-O(27)        | 2.533(10) | Sr(1)-O(17)        | 2.590(10) | Sr(1)-O(10)        | 2.592(10) |
| Sr(1)-O(52)        | 2.601(11) | Sr(1)-O(37)        | 2.625(10) | Sr(1)-O(41)        | 2.663(11) |
| Sr(1)-O(6)         | 2.663(10) | Sr(1)-O(15)        | 2.677(10) | Sr(1)-O(38)        | 2.814(11) |
| Zn(1)-O(18)#1      | 1.958(11) | Zn(1)-O(18)        | 1.958(11) | Zn(1)-O(74)        | 2.05(3)   |
| Zn(1)-O(26)#1      | 2.087(11) | Zn(1)-O(26)        | 2.087(11) | Zn(2)-O(31)        | 2.116(12) |
| Zn(2)-O(67)#1      | 1.916(13) | Zn(2)-O(67)        | 1.916(13) | Zn(2)-O(31)#1      | 2.116(12) |
| O(46)-Mo(1)-O(11)  | 104.0(5)  | O(65)-Mo(2)-O(3)   | 97.8(5)   | O(61)-Mo(3)-O(2)   | 98.2(5)   |
| O(46)-Mo(1)-O(40)  | 103.9(5)  | O(65)-Mo(2)-O(28)  | 100.0(6)  | O(61)-Mo(3)-O(8)   | 102.5(5)  |
| O(46)-Mo(1)-O(32)  | 99.2(5)   | O(65)-Mo(2)-O(11)  | 94.7(5)   | O(61)-Mo(3)-O(33)  | 93.4(5)   |
| O(46)-Mo(1)-O(49)  | 97.5(5)   | O(65)-Mo(2)-O(69)  | 95.8(5)   | O(61)-Mo(3)-O(47)  | 94.9(5)   |
| O(46)-Mo(1)-O(23)  | 171.4(5)  | O(65)-Mo(2)-O(6)   | 174.0(5)  | O(61)-Mo(3)-O(15)  | 172.0(5)  |
| O(66)-Mo(4)-O(8)   | 101.8(6)  | O(44)-Mo(5)-O(26)  | 101.9(6)  | O(72)-Mo(6)-O(16)  | 104.6(6)  |
| O(66)-Mo(4)-O(1)   | 100.4(6)  | O(44)-Mo(5)-O(38)  | 99.6(5)   | O(72)-Mo(6)-O(29)  | 102.1(6)  |
| O(66)-Mo(4)-O(9)   | 99.6(6)   | O(44)-Mo(5)-O(5)   | 95.9(5)   | O(72)-Mo(6)-O(34)  | 98.0(5)   |
| O(66)-Mo(4)-O(42)  | 93.1(6)   | O(44)-Mo(5)-O(10)  | 92.4(5)   | O(72)-Mo(6)-O(14)  | 97.2(6)   |
| O(66)-Mo(4)-O(25)  | 169.1(6)  | O(44)-Mo(5)-O(27)  | 169.1(5)  | O(72)-Mo(6)-O(24)  | 169.9(5)  |
| O(30)-Mo(7)-O(59)  | 104.6(6)  | O(55)-Mo(8)-O(67)  | 103.3(7)  | O(50)-Mo(9)-O(33)  | 104.4(5)  |
| O(30)-Mo(7)-O(56)  | 102.5(6)  | O(55)-Mo(8)-O(71)  | 98.6(6)   | O(50)-Mo(9)-O(22)  | 101.7(5)  |
| O(30)-Mo(7)-O(34)  | 97.9(5)   | O(55)-Mo(8)-O(38)  | 99.2(6)   | O(50)-Mo(9)-O(32)  | 98.7(5)   |
| O(30)-Mo(7)-O(60)  | 96.0(5)   | O(55)-Mo(8)-O(52)  | 91.2(6)   | O(50)-Mo(9)-O(13)  | 97.5(5)   |
| O(30)-Mo(7)-O(24)  | 170.1(5)  | O(55)-Mo(8)-O(17)  | 168.1(5)  | O(50)-Mo(9)-O(23)  | 170.4(5)  |
| O(70)-Mo(10)-O(1)  | 99.9(6)   | O(54)-Mo(11)-O(68) | 102.9(6)  | O(63)-Mo(12)-O(21) | 100.6(6)  |
| O(70)-Mo(10)-O(62) | 101.5(6)  | O(54)-Mo(11)-O(5)  | 103.7(6)  | O(63)-Mo(12)-O(3)  | 99.3(6)   |
| O(70)-Mo(10)-O(57) | 100.3(6)  | O(54)-Mo(11)-O(32) | 99.7(5)   | O(63)-Mo(12)-O(16) | 95.4(5)   |
| O(70)-Mo(10)-O(35) | 94.2(6)   | O(54)-Mo(11)-O(49) | 166.6(5)  | O(63)-Mo(12)-O(4)  | 97.1(6)   |
| O(70)-Mo(10)-O(20) | 169.5(6)  | O(54)-Mo(11)-O(13) | 86.0(5)   | O(63)-Mo(12)-O(37) | 174.6(5)  |
| O(36)-Mo(13)-O(62) | 101.0(6)  | O(43)-Mo(14)-O(7)  | 100.0(6)  | O(53)-Mo(15)-O(51) | 100.9(7)  |
| O(36)-Mo(13)-O(2)  | 98.4(5)   | O(43)-Mo(14)-O(28) | 100.8(5)  | O(53)-Mo(15)-O(71) | 104.0(6)  |
| O(36)-Mo(13)-O(59) | 93.7(5)   | O(43)-Mo(14)-O(9)  | 101.4(5)  | O(53)-Mo(15)-O(34) | 99.2(6)   |
| O(36)-Mo(13)-O(19) | 94.6(5)   | O(43)-Mo(14)-O(39) | 93.3(5)   | O(53)-Mo(15)-O(14) | 86.8(5)   |
| O(36)-Mo(13)-O(41) | 172.1(5)  | O(43)-Mo(14)-O(25) | 170.4(5)  | O(53)-Mo(15)-O(60) | 166.6(6)  |
| O(48)-Mo(16)-O(39) | 105.7(6)  | O(45)-Mo(17)-O(7)  | 99.1(6)   | O(58)-Mo(18)-O(12) | 105.1(6)  |
| O(48)-Mo(16)-O(42) | 102.2(6)  | O(45)-Mo(17)-O(21) | 102.3(6)  | O(58)-Mo(18)-O(35) | 105.2(7)  |
| O(48)-Mo(16)-O(40) | 97.8(5)   | O(45)-Mo(17)-O(57) | 100.9(6)  | O(58)-Mo(18)-O(29) | 97.0(6)   |
| O(48)-Mo(16)-O(22) | 94.1(5)   | O(45)-Mo(17)-O(12) | 94.1(5)   | O(58)-Mo(18)-O(56) | 96.0(6)   |
| O(48)-Mo(16)-O(23) | 162.5(5)  | O(45)-Mo(17)-O(20) | 169.8(5)  | O(58)-Mo(18)-O(24) | 163.0(6)  |
| O(37)-P(1)-O(20)   | 111.4(6)  | O(6)-P(2)-O(25)    | 111.4(6)  | O(18)-P(3)-O(27)   | 110.2(6)  |
| O(37)-P(1)-O(41)   | 107.8(6)  | O(6)-P(2)-O(15)    | 108.3(6)  | O(18)-P(3)-O(47)   | 109.7(6)  |
| O(37)-P(1)-O(24)   | 109.5(6)  | O(6)-P(2)-O(23)    | 108.8(6)  | O(18)-P(3)-O(13)   | 109.6(6)  |
| O(52)-P(4)-O(4)    | 109.3(6)  | O(17)-P(5)-O(19)   | 111.1(6)  | O(69)-P(6)-O(73)   | 110.5(7)  |
| O(52)-P(4)-O(64)   | 111.6(7)  | O(17)-P(5)-O(31)   | 111.4(6)  | O(69)-P(6)-O(10)   | 109.5(6)  |
| O(52)-P(4)-O(14)   | 107.8(6)  | O(17)-P(5)-O(60)   | 109.6(6)  | O(69)-P(6)-O(49)   | 110.3(6)  |
| O(27)-Sr(1)-O(17)  | 82.5(3)   | O(27)-Sr(1)-O(10)  | 64.6(3)   | O(27)-Sr(1)-O(52)  | 116.7(4)  |

|                     |          |                       |          |                     |          |
|---------------------|----------|-----------------------|----------|---------------------|----------|
| O(27)-Sr(1)-O(37)   | 169.7(3) | O(27)-Sr(1)-O(41)     | 118.6(3) | O(27)-Sr(1)-O(6)    | 100.3(3) |
| O(27)-Sr(1)-O(15)   | 72.0(3)  | O(27)-Sr(1)-O(38)     | 58.8(3)  | O(18)#1-Zn(1)-O(18) | 110.4(7) |
| O(18)#1-Zn(1)-O(74) | 124.8(3) | O(18)#1-Zn(1)-O(26)#1 | 94.3(5)  | O(18)#1-Zn(1)-O(26) | 93.2(5)  |
| O(67)#1-Zn(2)-O(67) | 165.1(8) | O(67)#1-Zn(2)-O(31)#1 | 103.0(5) | O(67)#1-Zn(2)-O(31) | 83.8(5)  |

Symmetry transformations used to generate equivalent atoms: #1 -x,-y,-z; #2 -x+1/2,-y+1/2,-z

**Table S6** Selected Hydrogen Bond Lengths (Å) and Bond Angles (°) of complexes **1-5**

|          | D-H...A          | d(D-H) | d(H...A) | <D-H...A | d(D...A)  | Symmetry                 |
|----------|------------------|--------|----------|----------|-----------|--------------------------|
| <b>1</b> | O41-H41A...O33   | 0.85   | 3.24     | 91.8     | 3.38(4)   |                          |
|          | O41-H41B...O36   | 0.85   | 3.07     | 90.1     | 3.19(4)   | [ x, y, z-1 ]            |
|          | O41-H41B...O39   | 0.85   | 2.82     | 117.0    | 3.30(4)   | [ -x+1/2, -y+1, z-1/2 ]  |
|          | O1W-H1WA...O9    | 0.85   | 2.95     | 107.0    | 3.30(5)   | [ -x+1/2, y-1/2, z+1/2 ] |
|          | O2W-H2WB...O16   | 0.85   | 3.33     | 85.0     | 3.37(3)   | [ x, -y+1/2, z ]         |
|          | O2W-H2WA...O28   | 0.85   | 2.55     | 122.8    | 3.10(3)   | [ x, -y+1/2, z+1 ]       |
|          | N2-H2...O24      | 0.86   | 2.00     | 160.4    | 2.82(4)   | [ x, y, z+1 ]            |
| <b>2</b> | O54- H54A...O50  | 0.85   | 2.55     | 115.0    | 3.008(8)  |                          |
|          | O54- H54A...O20  | 0.85   | 2.26     | 154.6    | 3.045(8)  |                          |
|          | O53- H53B... O26 | 0.85   | 2.24     | 133.0    | 3.009(7)  | [ -x+1, y+1/2, -z+1 ]    |
|          | O53- H53B... O10 | 0.85   | 2.55     | 112.8    | 2.982(8)  | [ -x+1, y+1/2, -z+1 ]    |
|          | O53- H53B... O1  | 0.85   | 2.56     | 141.6    | 3.265(7)  | [ -x+1, y+1/2, -z+1 ]    |
|          | N2-H2-O9         | 0.86   | 2.07     | 176.7    | 2.926(9)  | [ x+1, y, z+1 ]          |
|          | O1W-H1WB-O56     | 0.85   | 2.25     | 143.3    | 2.975(9)  | [ x, y, z+1 ]            |
|          | N7-H7-O1W        | 0.86   | 1.95     | 153.4    | 2.746(12) | [ -x+1, y-1/2, -z+1 ]    |
|          | O2W-H2WA-O57     | 0.85   | 2.51     | 89.2     | 2.643(9)  | [ x, y-1, z ]            |
|          | O2W-H2WB-O68     | 0.85   | 2.49     | 122.5    | 3.028(10) | [ x, y-1, z ]            |
|          | N8-H8-O62        | 0.86   | 2.42     | 128.0    | 3.030(12) | [ x+1, y, z+1 ]          |
|          | N9-H9-O55        | 0.86   | 2.62     | 136.9    | 3.302(12) | [ -x+1, y-1/2, -z+1 ]    |
|          | N9-H9-O33        | 0.86   | 2.64     | 128.5    | 3.248(11) | [ -x+1, y+1/2, -z+1 ]    |
|          | N11- H40-O45     | 0.86   | 2.61     | 110.9    | 3.027(14) | [ x, y-1, z ]            |
|          | N10-H10-O25      | 0.86   | 2.21     | 143.9    | 2.946(12) | [ x+1, y-1, z ]          |
|          | N10-H10-O36      | 0.86   | 2.52     | 121.4    | 3.054(11) | [ -x+2, y-1/2, -z+1 ]    |
| <b>3</b> | N1-H1A...O1W     | 0.86   | 1.99     | 155.4    | 2.799(17) |                          |
|          | O69-H69A...O19   | 0.85   | 2.32     | 146.9    | 3.064(11) |                          |
|          | O32-H32B...O30   | 0.85   | 2.84     | 89.0     | 2.953(11) |                          |
|          | O2W-H2WB...O56   | 0.85   | 2.53     | 114.0    | 2.974(14) | [ -x+1, y+1/2, -z ]      |
|          | O2W-H2WA...O52   | 0.85   | 2.37     | 137.2    | 3.053(16) | [ x-1, y, z ]            |
|          | O1W-H1WB...O49   | 0.85   | 2.51     | 142.3    | 3.223(14) | [ -x+1, y-1/2, -z ]      |
|          | O1W-H1WB...O59   | 0.85   | 2.29     | 137.4    | 2.968(14) | [ -x+1, y-1/2, -z ]      |
|          | O1W-H1WA...O63   | 0.85   | 2.55     | 130.8    | 3.175(15) | [ x-1, y, z ]            |
|          | N9-H9A...O45     | 0.86   | 2.42     | 128.6    | 3.034(19) | [ -x+1, y+1/2, -z ]      |
|          | N4-H4A...O71     | 0.86   | 2.51     | 123.0    | 3.066(15) | [ -x+2, y-1/2, -z+1 ]    |
|          | N4-H4A...O46     | 0.86   | 2.21     | 141.6    | 2.933(17) | [ x, y-1, z ]            |
|          | O69-H69B...O71   | 0.85   | 3.18     | 85.3     | 3.227(11) | [ -x+2,y+1/2,-z+1 ]      |
|          | O32-H32C...O50   | 0.85   | 2.54     | 125.9    | 3.114(12) | [ -x+2,y+1/2, -z+1 ]     |
|          | O32-H32C...O1    | 0.85   | 2.50     | 149.3    | 3.259(12) | [ -x+2, y+1/2, -z+1 ]    |
|          | O32-H32C...O26   | 0.85   | 2.29     | 141.8    | 3.006(11) | [ -x+2,y+1/2, -z+1 ]     |

|   |                |      |      |       |           |                          |
|---|----------------|------|------|-------|-----------|--------------------------|
| 4 | O48-H48A...O29 | 0.85 | 2.72 | 90.2  | 2.853(10) |                          |
|   | O68-H68A...O22 | 0.85 | 2.40 | 141.3 | 3.114(11) |                          |
|   | O68-H68A...O71 | 0.85 | 2.62 | 139.4 | 3.314(12) |                          |
|   | O2W-H2WA...O51 | 0.85 | 2.48 | 108.4 | 2.866(12) |                          |
|   | O1W-H1WA...O49 | 0.85 | 3.09 | 96.0  | 3.291(13) |                          |
|   | O48-H48B...O26 | 0.85 | 2.37 | 134.0 | 3.028(10) | $[-x+1, y-1/2, -z+1]$    |
|   | O48-H48B...O46 | 0.85 | 2.43 | 137.2 | 3.107(11) | $[-x+1, y-1/2, -z+1]$    |
|   | O48-H48B...O1  | 0.85 | 2.49 | 146.8 | 3.235(10) | $[-x+1, y-1/2, -z+1]$    |
|   | O68-H68B...O57 | 0.85 | 2.99 | 87.5  | 3.074(11) | $[-x+1, y-1/2, -z+1]$    |
|   | O2W-H2WB...O66 | 0.85 | 2.48 | 118.6 | 2.985(11) | $[-x+1, y-1/2, -z]$      |
|   | O1W-H1WB...O67 | 0.85 | 2.12 | 168.1 | 2.961(12) | $[-x+1, y+1/2, -z]$      |
| 5 | O5W-H5WB...O45 | 0.85 | 2.52 | 95.5  | 2.73(2)   |                          |
|   | O74-H74A...O67 | 0.85 | 2.18 | 152.3 | 2.96(2)   |                          |
|   | N5-H5...O6W    | 0.86 | 2.28 | 144.8 | 3.02(5)   |                          |
|   | N2-H2...O73    | 0.86 | 2.08 | 157.9 | 2.90(2)   | $[-x, -y+1, -z+1]$       |
|   | N2-H2...O44    | 0.86 | 2.46 | 111.3 | 2.89(2)   | $[-x, -y+1, -z+1]$       |
|   | N2-H2...O5     | 0.86 | 2.61 | 116.3 | 3.09(2)   | $[-x, -y+1, -z+1]$       |
|   | N4-H4...O68    | 0.86 | 1.99 | 169.3 | 2.84(2)   | $[x+1/2, y+1/2, z]$      |
|   | N5-H5...O19    | 0.86 | 2.59 | 133.9 | 3.24(2)   | $[-x+1, y, -z+1/2]$      |
|   | N7-H7...O71    | 0.86 | 2.54 | 125.4 | 3.11(3)   | $[x+1/2, y-1/2, z]$      |
|   | N10-H10A...O1W | 0.86 | 1.80 | 168.1 | 2.65(4)   | $[-x+1, y, -z+1/2]$      |
|   | O74-H74B...O67 | 0.85 | 2.18 | 152.3 | 2.96(2)   | $[-x, y, -z+1/2]$        |
|   | O2W-H2WA...O64 | 0.85 | 2.53 | 106.5 | 2.89(2)   | $[-x+1/2, -y+3/2, -z+1]$ |
|   | O2W-H2WA...O46 | 0.85 | 2.85 | 105.2 | 3.18(2)   | $[x+1/2, y+1/2, z]$      |
|   | O3W-H3WA...O69 | 0.85 | 2.38 | 109.5 | 2.78(2)   | $[-x+1, -y+1, -z+1]$     |
|   | O3W-H3WA...O55 | 0.85 | 2.96 | 99.3  | 3.21(3)   | $[x+1, y, z]$            |
|   | O3W-H3WB...O10 | 0.85 | 2.32 | 159.7 | 3.13(2)   | $[x+1, y, z]$            |
|   | O4W-H4WA...O61 | 0.85 | 2.35 | 140.5 | 3.05(3)   | $[x, -y+1, z+1/2]$       |
|   | O4W-H4WB...O26 | 0.85 | 2.16 | 138.6 | 2.86(4)   | $[-x, -y+1, -z+1]$       |
|   | O6W-H6WB...O19 | 0.85 | 2.28 | 151.3 | 3.05(5)   | $[-x+1, y, -z+1/2]$      |

### 3. Physical characterization

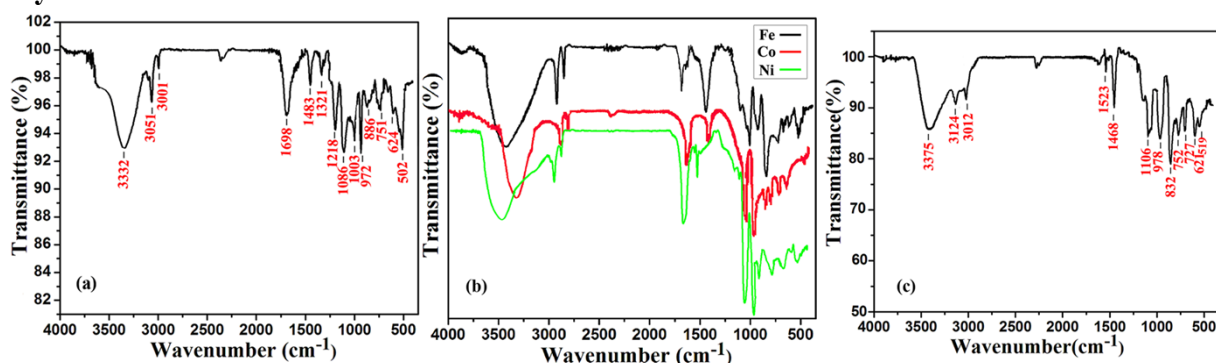

**Fig. S13** IR spectra of (a) compound 1, (b) Fe for compound 2, Co for compound 3, and Ni for 4, (c) compound 5.

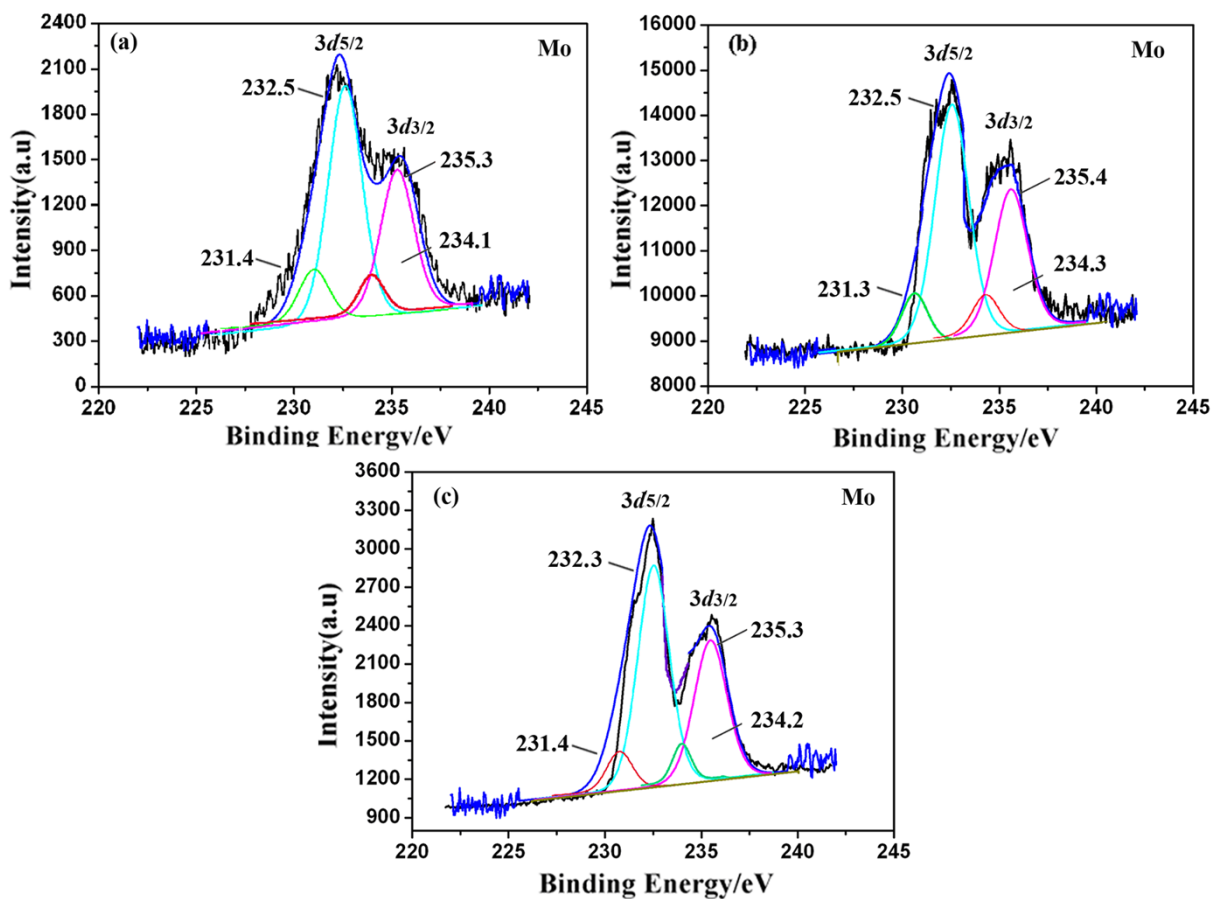

**Fig. S14** The XPS spectrum of (a) compound 1, (b) compound 2, and (c) compound 5



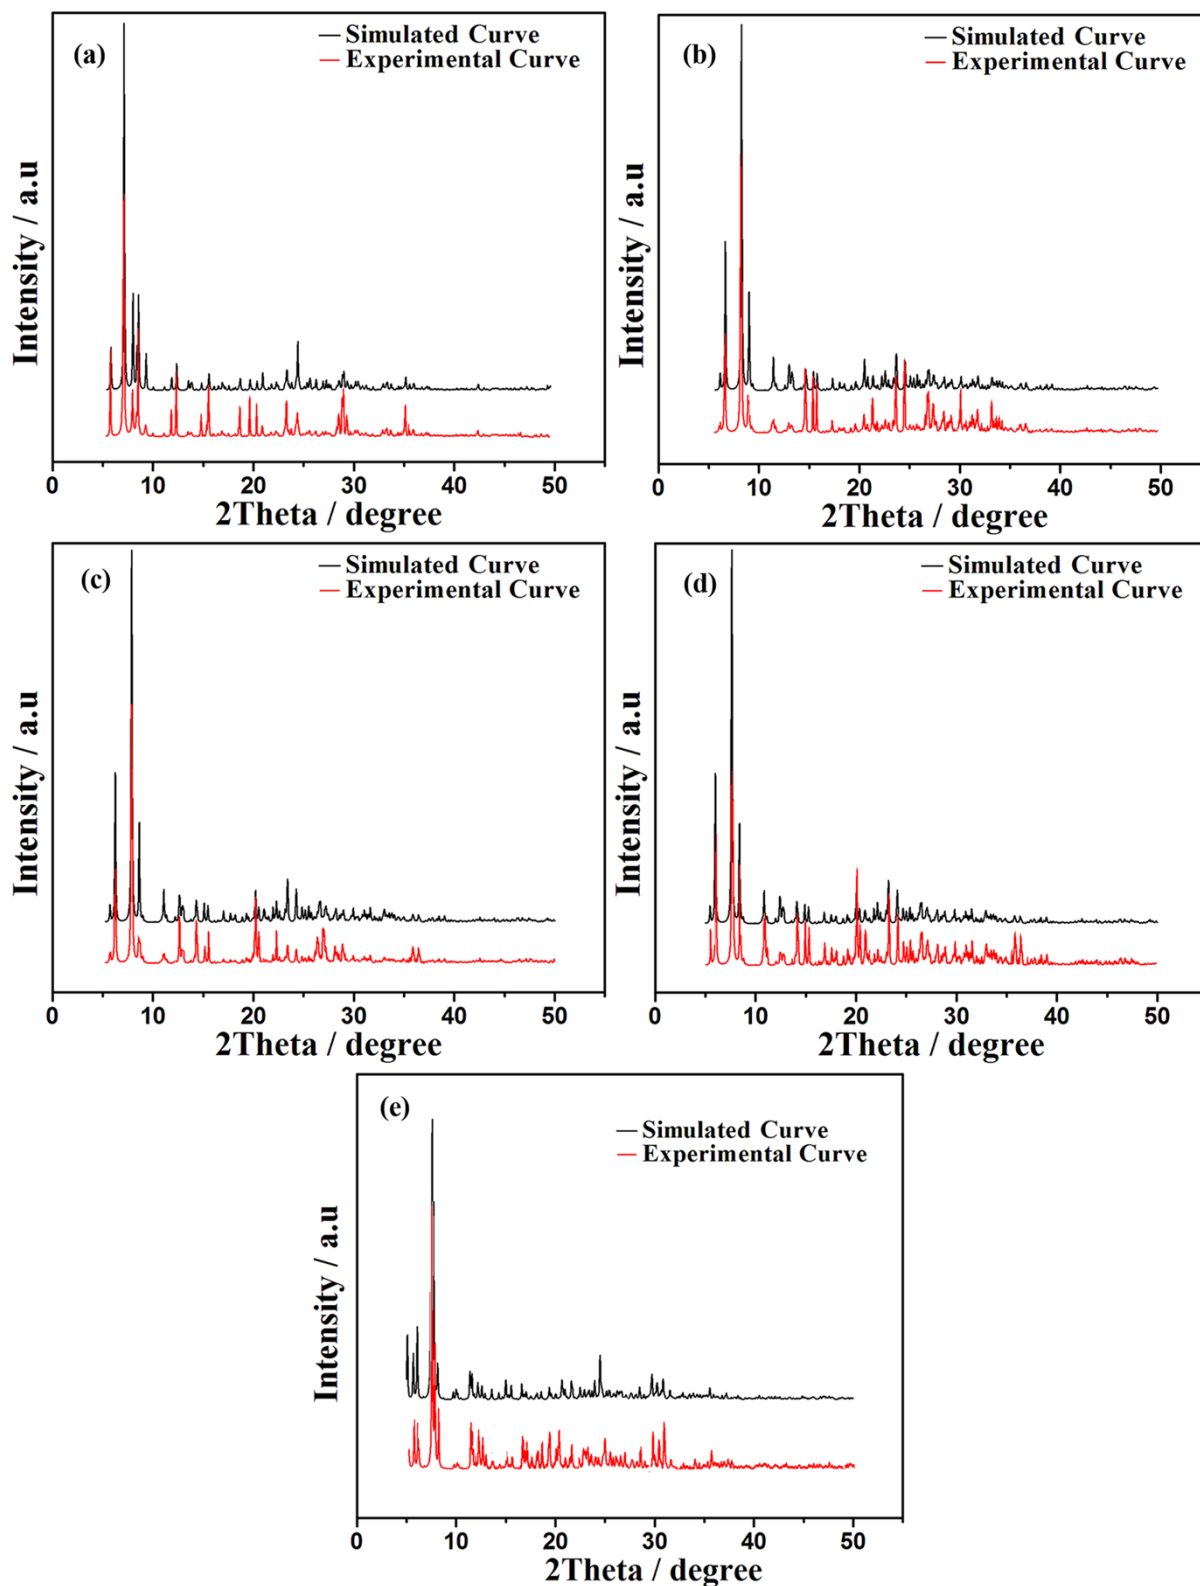

**Fig. S15** The PXRD contrast curves of (a) compound 1, (b) compound 2, (c) compound 3, (d) compound 4, and (e) compound 5

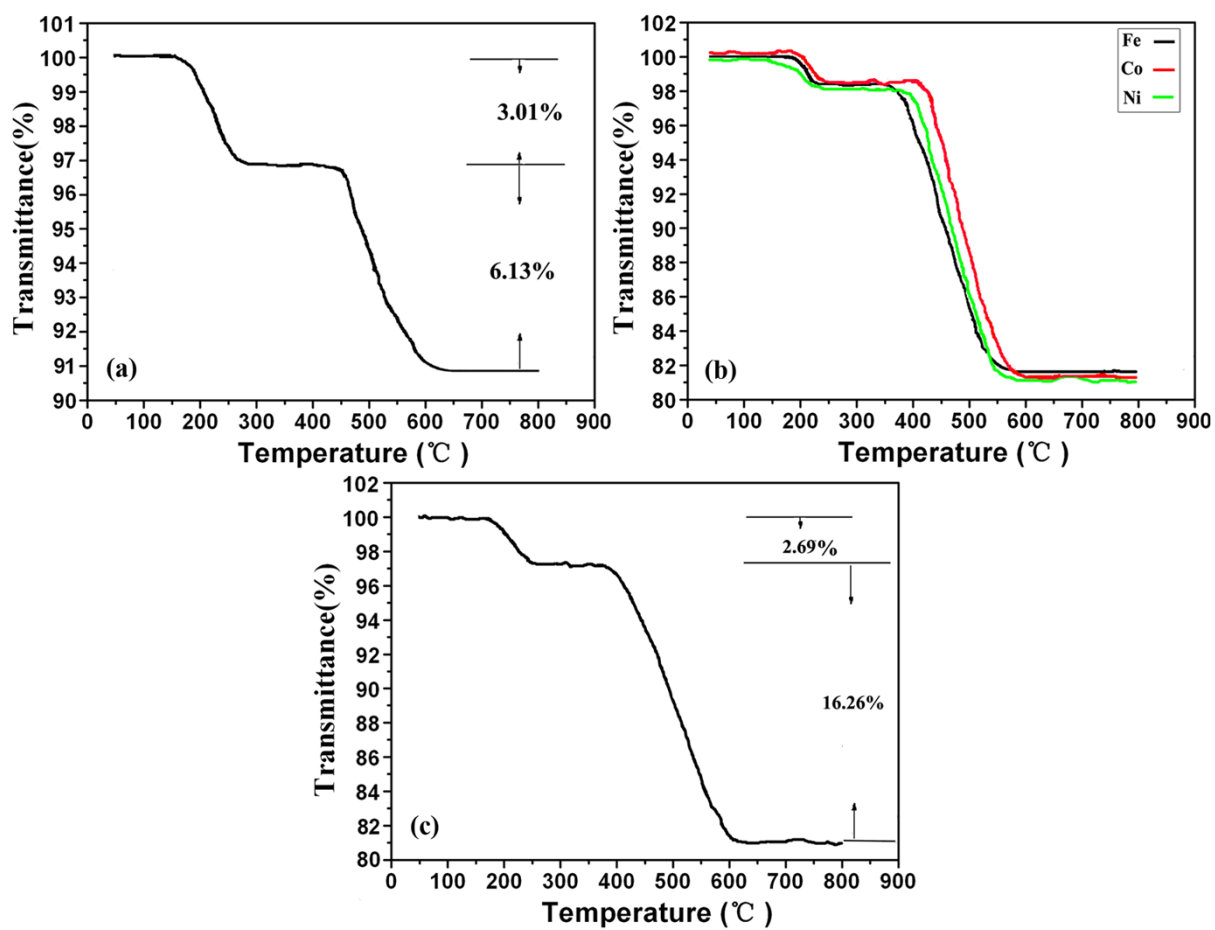

**Fig. S16** TG of (a) compound 1, (b) Fe for compound 2, Co for compound 3, and Ni for 4, (c) compound 5.

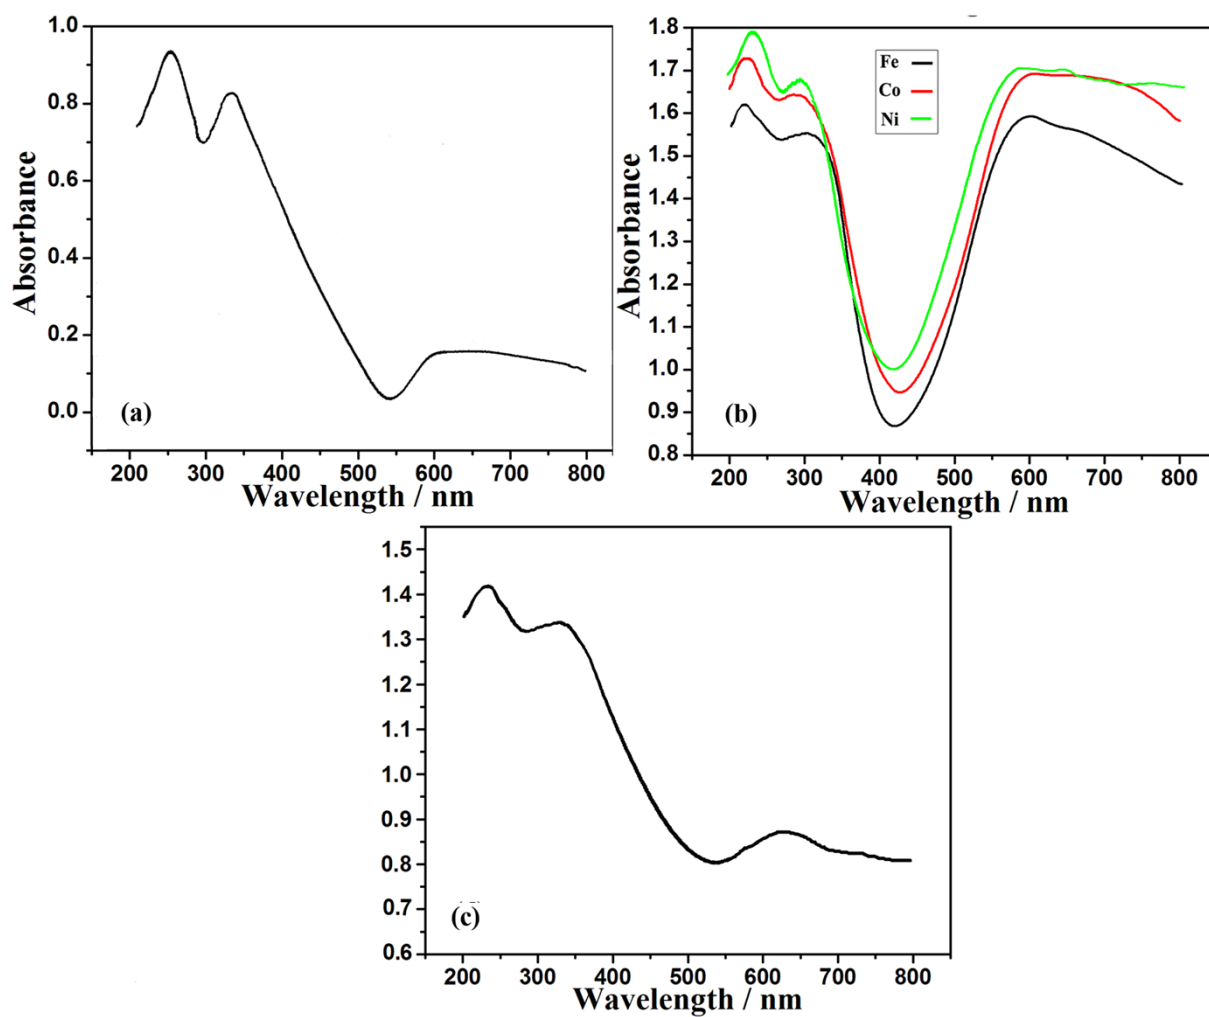

**Fig. S17** The UV-vis spectra of (a) compound 1, (b) Fe for compound 2, Co for compound 3, and Ni for 4, (c) compound 5 in solid state at room temperature.

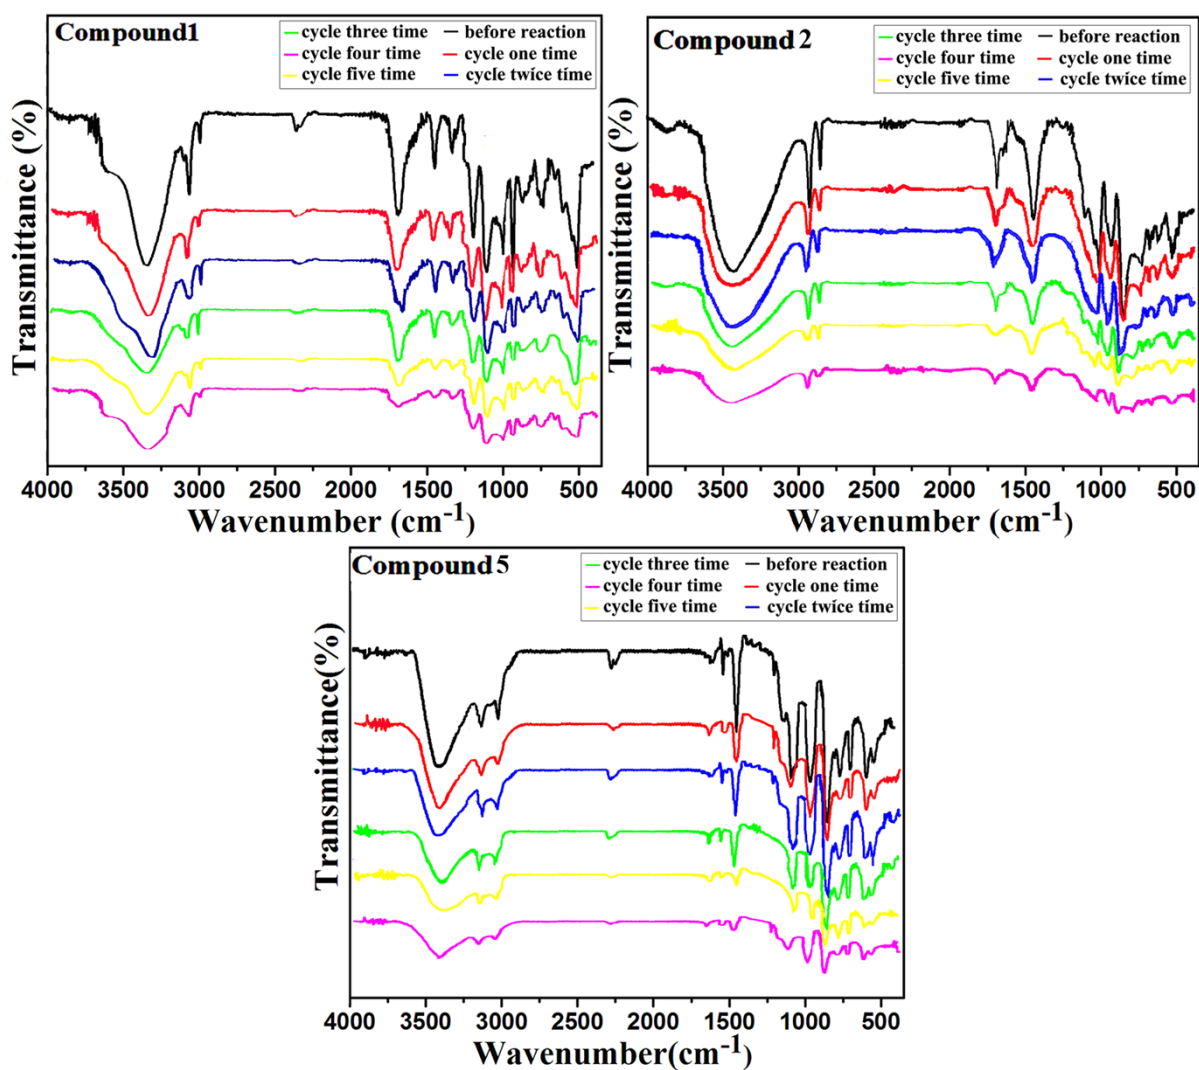

Figure S18 The IR spectra of catalyst 1, 2, and 5 before and after cycle reaction

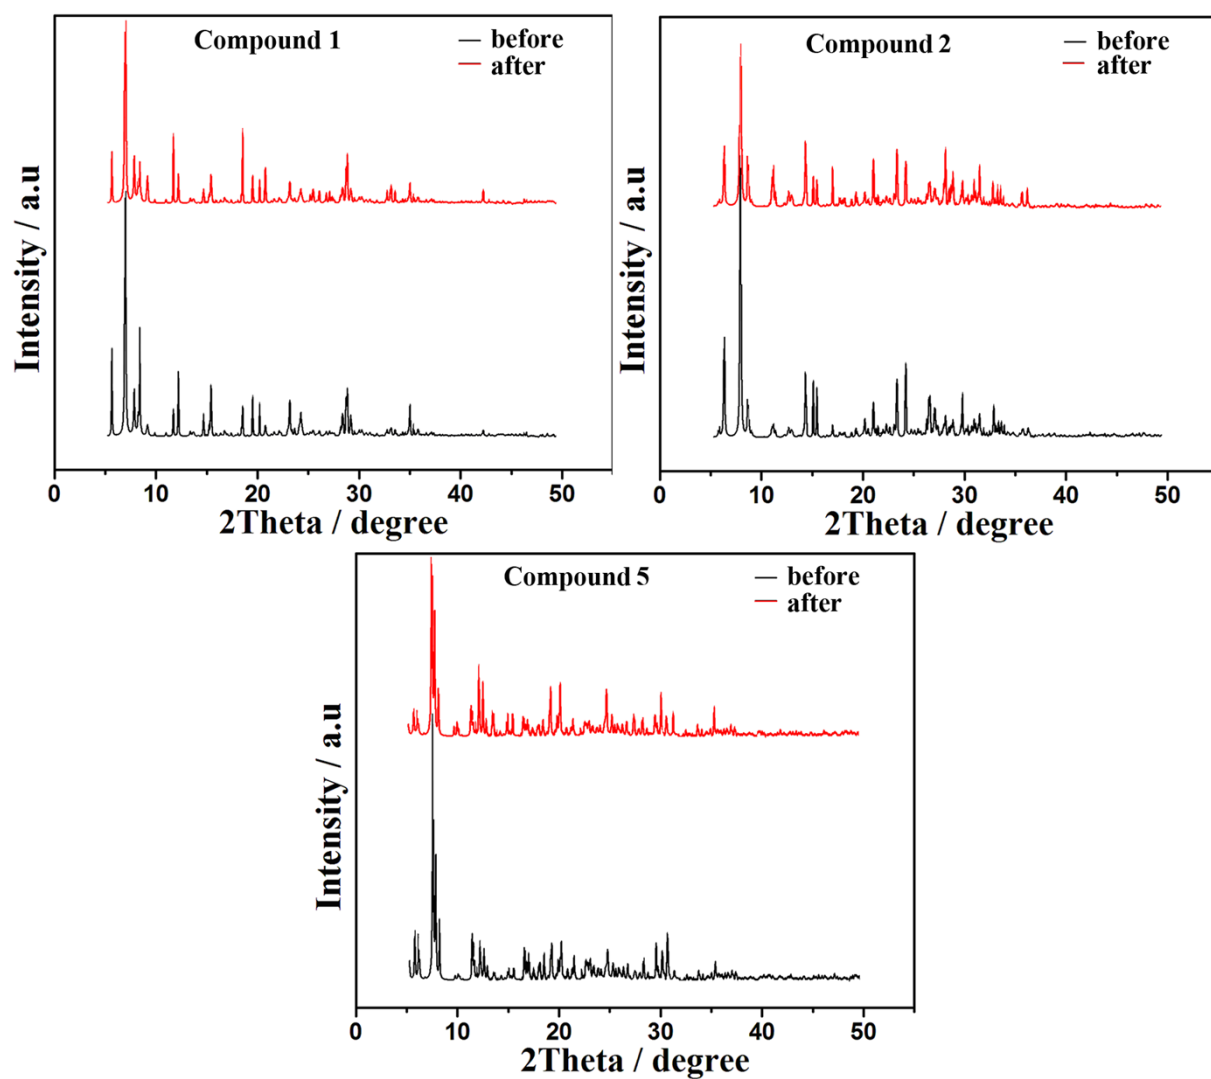

**Figure S19** The XRD patterns of catalyst 1, 2, and 5 before and after cycle five time.

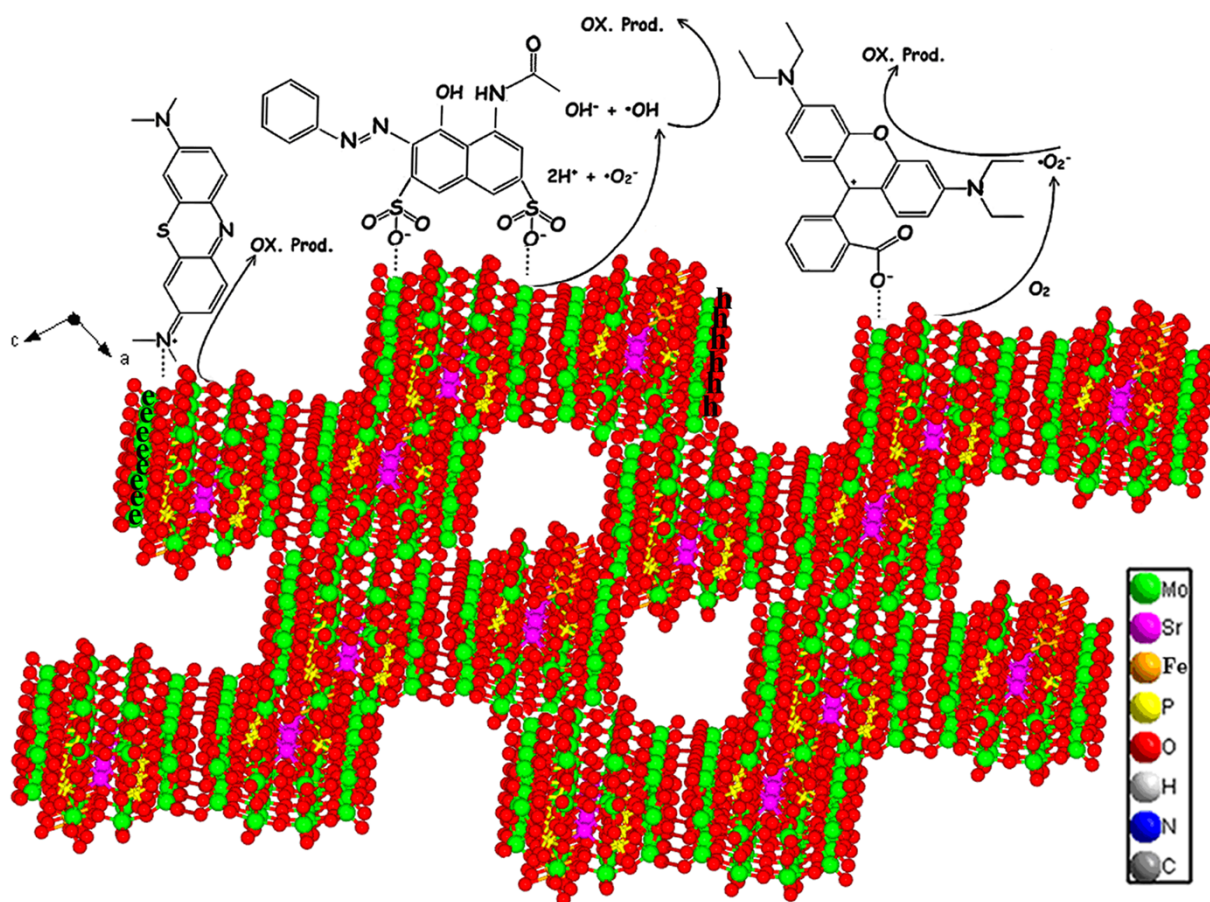

**Figure S20** The degradation schematic of MB, RhB, and AP on the surface of compound 2.

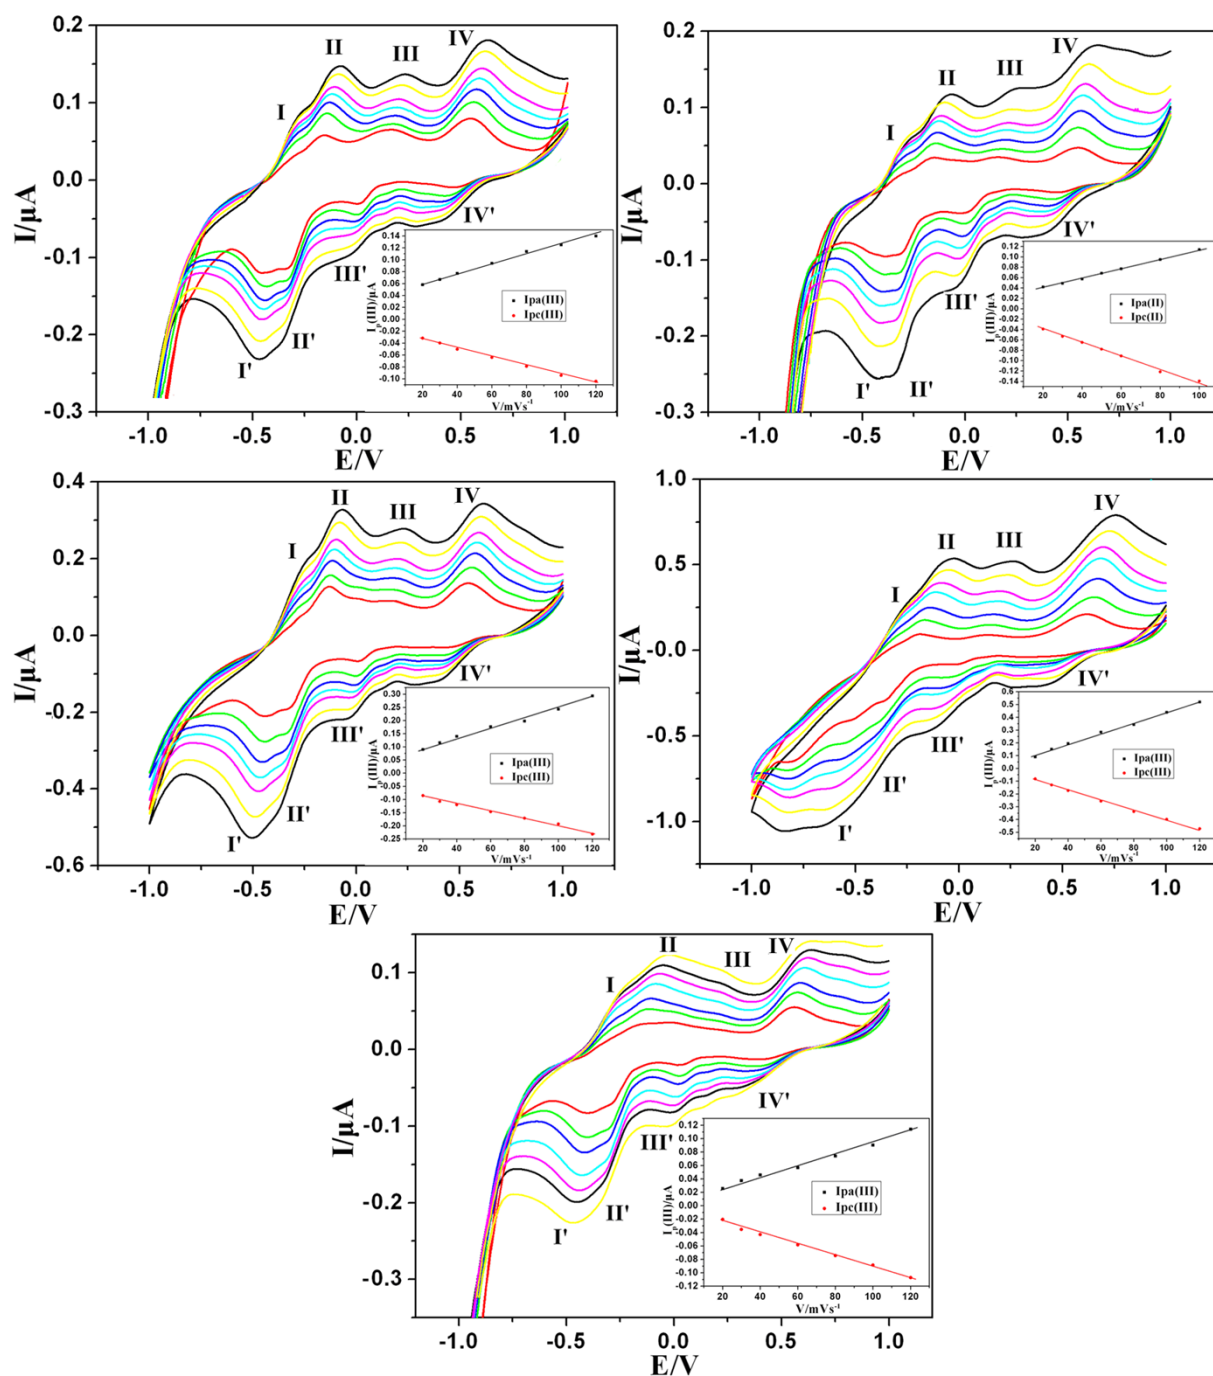

**Figure S21** Cyclic voltammograms of (a) **1-CPE**, (b) **2-CPE**, (c) **3-CPE**, (d) **4-CPE**, and (e) **5-CPE** in the 1.0 M  $\text{H}_2\text{SO}_4$  solution at scan rate of  $20 \text{ mV s}^{-1}$ ; scan rates (from inner to outer:  $20, 30, 40, 60, 80, 100,$  and  $120 \text{ mV s}^{-1}$ ). Potentials vs. SCE. (Insert plots: The dependence of anodic and cathodic peak III current on scan rates.); The CV of **1-CPE** show **four** reversible redox peaks in the potential range  $+1.0$  to  $-1.0 \text{ V}$ . The mean peak potentials [ $E_{1/2} = (E_{\text{pa}} + E_{\text{pc}})/2$ ] are  **$+0.46, +0.13, -0.20,$  and  $-0.34 \text{ V}$**  for **1**,  **$+0.48, +0.09, -0.25,$  and  $-0.35 \text{ V}$**  for **2**,  **$+0.48, +0.12, -0.25,$  and  $-0.35 \text{ V}$**  for **3**,  **$+0.49, +0.05, -0.27,$  and  $-0.33 \text{ V}$**  for **4**,  **$+0.51, +0.12, -0.19,$  and  $-0.29 \text{ V}$**  for **5**, respectively (based on the CV at  $20 \text{ mV s}^{-1}$ ), which ascribed to four consecutive two-electron processes of basket  $[\text{Sr}(\text{P}_6\text{Mo}_{18}\text{O}_{73})]^{8-}$  heteropolymolybdate framework. The dependence of anodic and cathodic peak III current on scan rates. The peak currents were proportional to the scan rate when the scan rate is varied from  $20$  to  $120 \text{ mV s}^{-1}$ , indicating that the redox process of the **1-5-CPE** are surface-controlled.
